# Supplementary material for: Association of the dysfunctional placentation endotype of prematurity with bronchopulmonary dysplasia: a systematic review, meta-analysis and meta-regression
Source: HighWire-hosted journal article supplement (doi:10.1136/thoraxjnl-2020-216485), 2021-07-23
Supplement: thoraxjnl-2020-216485supp001_data_supplement.pdf [file thoraxjnl-2020-216485supp001_data_supplement.pdf]

## Supplementary Material

### Association of the Dysfunctional Placentation Endotype of Prematurity with Bronchopulmonary Dysplasia: A Systematic Review, Meta-analysis and Meta-regression

#### 1. Methods

##### 1.1. Search strategy

Pubmed

|   |                                                                                                                                                                                                                                                                                                                                                                                                                                                                                                                                                                                                                                                                                                                                                                                                                                                                                                                                                                                                                                                                                                                                                                                                                                                                                                                                                                                                                                                                                                                                                                                                                                          |
|---|------------------------------------------------------------------------------------------------------------------------------------------------------------------------------------------------------------------------------------------------------------------------------------------------------------------------------------------------------------------------------------------------------------------------------------------------------------------------------------------------------------------------------------------------------------------------------------------------------------------------------------------------------------------------------------------------------------------------------------------------------------------------------------------------------------------------------------------------------------------------------------------------------------------------------------------------------------------------------------------------------------------------------------------------------------------------------------------------------------------------------------------------------------------------------------------------------------------------------------------------------------------------------------------------------------------------------------------------------------------------------------------------------------------------------------------------------------------------------------------------------------------------------------------------------------------------------------------------------------------------------------------|
| 1 | ((((outcome AND preterm)) OR (risk factor AND preterm))) AND (((((((case control) OR Case-Control Study) OR Case-Base Studies) OR cohort study) OR Observational study) OR RCT) OR Randomized controlled trial))) AND (((((((preterm infant [mesh]) OR premature infant [tiab]) OR premature infant) OR Neonatal Prematurity) OR Infants) OR Premature) OR Prematurity) OR Neonatal) OR Neonatal) OR before 37 completed weeks of gestation))) AND (((pre-eclampsia AND preterm))) OR (((EPH AND preterm AND preterm)) OR (hellp syndrome AND preterm)) OR (gestational hypertensive disorder AND preterm)) OR (pre-existing hypertension AND preterm)) OR (eclampsia AND preterm)) OR (toxemia AND preterm)) OR (pregnancy toxemia AND preterm)) OR (edema proteinuria hypertension gestosis AND preterm)) OR (hypertensive disorders of pregnancy AND preterm)) OR (maternal hypertension AND preterm)))                                                                                                                                                                                                                                                                                                                                                                                                                                                                                                                                                                                                                                                                                                                               |
| 2 | (bronchopulmonary dysplasia [MESH] OR bronchopulmonary dysplasia [tiab] OR BPD [tiab] OR chronic lung disease [tiab] OR CLD [tiab] OR pulmonary hypertension [MESH] OR pulmonary hypertension [tiab])<br>AND<br>(preterm infant [tiab] OR Premature Infant [tiab] OR Premature Infants [tiab] OR preterm infants [tiab] OR neonatal prematurity [tiab] OR very low birth weight infant [tiab] OR Very-Low-Birth-Weight Infant [tiab] OR Very-Low-Birth-Weight Infants [tiab] OR very low birth weight infants [tiab] OR Extremely Low Birth Weight Infant [tiab] OR Extremely Low Birth Weight Infants [tiab] OR preterm infant [MESH] OR Premature Infant [MESH] OR Premature Infants [MESH] OR preterm infants [MESH] OR neonatal prematurity [MESH] OR very low birth weight infant [MESH] OR Very-Low-Birth-Weight Infant [MESH] OR Very-Low-Birth-Weight Infants [MESH] OR very low birth weight infants [MESH] OR Extremely Low Birth Weight Infant [MESH] OR Extremely Low Birth Weight Infants)<br>AND<br>(cohort [MESH] OR Incidence Studies [MESH] OR Incidence Study [MESH] OR concurrent studies [MESH] OR concurrent studies [MESH] OR cohort analysis [MESH] OR observational studies [MESH] OR observational study [MESH] OR case control study [MESH] OR case control studies [MESH] OR case control [MESH] OR cohort [tiab] OR Incidence Studies [tiab] OR Incidence Study [tiab] OR concurrent studies [tiab] OR concurrent studies [tiab] OR cohort analysis [tiab] OR observational studies [tiab] OR observational study [tiab] OR case control study [tiab] OR case control studies [tiab] OR case control [tiab]) |

|          |                                                                                                                                                                                                                                                                                                                                                                                                                                                                                                                                                                                                                                                                                                                                                                                                                                                                                                                                                                                                                                                                                                                                                                                                                                                                                                                                                                                                                                                                                                                                                                                                                                                                                                                                                                                                                                                                                                                        |
|----------|------------------------------------------------------------------------------------------------------------------------------------------------------------------------------------------------------------------------------------------------------------------------------------------------------------------------------------------------------------------------------------------------------------------------------------------------------------------------------------------------------------------------------------------------------------------------------------------------------------------------------------------------------------------------------------------------------------------------------------------------------------------------------------------------------------------------------------------------------------------------------------------------------------------------------------------------------------------------------------------------------------------------------------------------------------------------------------------------------------------------------------------------------------------------------------------------------------------------------------------------------------------------------------------------------------------------------------------------------------------------------------------------------------------------------------------------------------------------------------------------------------------------------------------------------------------------------------------------------------------------------------------------------------------------------------------------------------------------------------------------------------------------------------------------------------------------------------------------------------------------------------------------------------------------|
| <b>3</b> | <p>(fetal growth restriction [tiab] OR intrauterine growth [tiab] OR absent end diastolic [tiab] OR reversed end diastolic [tiab] OR small for gestational age [tiab] OR SGA [tiab] OR small for date [tiab] OR IUGR [tiab] OR fetal growth restriction [MESH] OR intrauterine growth [MESH] OR absent end diastolic [MESH] OR reversed end diastolic [MESH] OR small for gestational age [MESH] OR SGA [MESH] OR small for date [MESH] OR IUGR [MESH] )</p> <p>AND</p> <p>(preterm infant [tiab] OR Premature Infant [tiab] OR Premature Infants [tiab] OR preterm infants [tiab] OR neonatal prematurity [tiab] OR very low birth weight infant [tiab] OR Very-Low-Birth-Weight Infant [tiab] OR Very-Low-Birth-Weight Infants [tiab] OR very low birth weight infants [tiab] OR Extremely Low Birth Weight Infant [tiab] OR Extremely Low Birth Weight Infants [tiab] OR preterm infant [MESH] OR Premature Infant [MESH] OR Premature Infants [MESH] OR preterm infants [MESH] OR neonatal prematurity [MESH] OR very low birth weight infant [MESH] OR Very-Low-Birth-Weight Infant [MESH] OR Very-Low-Birth-Weight Infants [MESH] OR very low birth weight infants [MESH] OR Extremely Low Birth Weight Infant [MESH] OR Extremely Low Birth Weight Infants [MESH])</p> <p>AND</p> <p>(cohort [MESH] OR Incidence Studies [MESH] OR Incidence Study [MESH] OR concurrent studies [MESH] OR concurrent studies [MESH] OR cohort analysis [MESH] OR observational studies [MESH] OR observational study [MESH] OR case control study [MESH] OR case control studies [MESH] OR case control [MESH] OR cohort [tiab] OR Incidence Studies [tiab] OR Incidence Study [tiab] OR concurrent studies [tiab] OR concurrent studies [tiab] OR cohort analysis [tiab] OR observational studies [tiab] OR observational study [tiab] OR case control study [tiab] OR case control studies [tiab] OR case control [tiab])</p> |
|----------|------------------------------------------------------------------------------------------------------------------------------------------------------------------------------------------------------------------------------------------------------------------------------------------------------------------------------------------------------------------------------------------------------------------------------------------------------------------------------------------------------------------------------------------------------------------------------------------------------------------------------------------------------------------------------------------------------------------------------------------------------------------------------------------------------------------------------------------------------------------------------------------------------------------------------------------------------------------------------------------------------------------------------------------------------------------------------------------------------------------------------------------------------------------------------------------------------------------------------------------------------------------------------------------------------------------------------------------------------------------------------------------------------------------------------------------------------------------------------------------------------------------------------------------------------------------------------------------------------------------------------------------------------------------------------------------------------------------------------------------------------------------------------------------------------------------------------------------------------------------------------------------------------------------------|

## EMBASE

|          |                                                                                                                                                                                                                                                                                   |
|----------|-----------------------------------------------------------------------------------------------------------------------------------------------------------------------------------------------------------------------------------------------------------------------------------|
| <b>1</b> | (pre-eclampsia or preeclampsia or EPH or hellp syndrome or gestational hypertensive disorder or pre-existing hypertension or eclampsia or toxemia or pregnancy toxemia or edema proteinuria hypertension gestosis or maternal hypertension or pregnancy-induced hypertension).af. |
| <b>2</b> | (premature infant or Neonatal Prematurity or Infants, Premature or Prematurity or Neonatal or Preterm Infants).af.                                                                                                                                                                |
| <b>3</b> | (case control or Case-Control Study or Case-Base Studies or cohort study or RCT).af.                                                                                                                                                                                              |
| <b>4</b> | (risk factors or outcome or risk factor).af.                                                                                                                                                                                                                                      |
| <b>5</b> | 1 and 2 and 3 and 4                                                                                                                                                                                                                                                               |
| <b>6</b> | ('chronic lung disease'/exp OR 'chronic lung disease') AND ('intrauterine growth retardation'/exp OR 'intrauterine growth retardation')                                                                                                                                           |
| <b>7</b> | ('chronic lung disease'/exp OR 'chronic lung disease' OR 'pulmonary hypertension') AND ('prematurity'/exp OR 'prematurity') AND ('cohort analysis'/exp OR 'cohort analysis' OR 'case control study'/exp OR 'case control study')                                                  |
| <b>8</b> | ('intrauterine growth retardation'/exp OR 'intrauterine growth retardation') AND ('prematurity'/exp OR 'prematurity') AND ('cohort analysis'/exp OR 'cohort analysis' OR 'case control study'/exp OR 'case control study')                                                        |

## Web of Science

|          |                                                                                                                                                                                                                                                                                                                                                                                                                                                                                                                                                                                                                                             |
|----------|---------------------------------------------------------------------------------------------------------------------------------------------------------------------------------------------------------------------------------------------------------------------------------------------------------------------------------------------------------------------------------------------------------------------------------------------------------------------------------------------------------------------------------------------------------------------------------------------------------------------------------------------|
| <b>1</b> | <b>TOPIC:</b> (pre-eclampsia or preeclampsia or EPH or hellp syndrome or gestational hypertensive disorder or hypertensive disorders of pregnancy or pre-existing hypertension or eclampsia or toxemia or pregnancy toxemia or edema proteinuria hypertension gestosis or maternal hypertension or pregnancy-induced hypertension) <b>AND TOPIC:</b> (premature infant or Neonatal Prematurity or Infants, Premature or Prematurity or Neonatal or Preterm Infants) <b>AND TOPIC:</b> (case control or Case-Control Study or Case-Base Studies or cohort study or observational) <b>AND TOPIC:</b> (risk factors or outcome or risk factor) |
| <b>2</b> | ((bronchopulmonary dysplasia OR BPD OR chronic lung disease) AND ("preterm infant" OR "Premature Infant" OR "Premature Infants" OR "preterm infants" OR "neonatal prematurity" OR "very low birth weight" OR "Extremely Low Birth Weight" OR Extremely Low Birth Weight Infants) AND (cohort OR "Incidence Studies" OR "Incidence Study" OR "concurrent studies" OR "concurrent studies" OR "cohort analysis" OR "observational studies" OR "observational study" OR case control))                                                                                                                                                         |

|          |                                                                                                                                                                                                                                                                                                                                                                                                                                                                                                                                                                                               |
|----------|-----------------------------------------------------------------------------------------------------------------------------------------------------------------------------------------------------------------------------------------------------------------------------------------------------------------------------------------------------------------------------------------------------------------------------------------------------------------------------------------------------------------------------------------------------------------------------------------------|
| <b>3</b> | ((“fetal growth restriction” OR “intrauterine growth retardation” or “intrauterine growth restriction” OR “small for gestational age”) AND (“preterm infant” OR “Premature Infant” OR “Premature Infants” OR “preterm infants” OR “neonatal prematurity” OR “very low birth weight” OR “Extremely Low Birth Weight” OR Extremely Low Birth Weight Infants) AND (cohort OR Incidence Studies OR Incidence Study OR concurrent studies OR concurrent studies OR cohort analysis OR observational studies OR observational study OR case control study OR case control studies OR case control)) |
|----------|-----------------------------------------------------------------------------------------------------------------------------------------------------------------------------------------------------------------------------------------------------------------------------------------------------------------------------------------------------------------------------------------------------------------------------------------------------------------------------------------------------------------------------------------------------------------------------------------------|

No language limits were set. Narrative reviews, systematic reviews, case reports, letters, editorials, and commentaries were excluded, but read to identify potential additional studies. Additional strategies to identify studies included manual review of reference lists from key articles that fulfilled our eligibility criteria, use of “related articles” feature in PubMed, and use of the “cited by” tool in Web of Science and Google scholar. Two reviewers independently screened the results of the searches, and included studies according to the inclusion criteria using EndNote (RRID:SCR\_014001), using the methodology described by Bramer et al.<sup>1</sup>

## 1.2. Supplementary information on methods

### *Study selection*

Studies were included if they examined preterm (gestational age, GA <37 weeks) or very low birth weight (<1500g) infants and reported primary data that could be used to measure the association between exposure to hypertensive disorders of pregnancy (HDP) or small for GA (SGA)/intrauterine growth restriction (IUGR) and the development of BPD. Therefore, we selected cohort or case-control studies in which the exposure (HDP or SGA/IUGR) was the independent variable and the outcome (BPD) the dependent variable as well as studies in which the outcome was the independent variable and the exposure the dependent variable. Studies that exclusively included late preterm infants (GA  $\geq$ 34 weeks) or that combined preterm and term infants were excluded. The absence of a clear definition of BPD was also an exclusion criterion. Due to the high number of included studies, no additional efforts were made to clarify the definitions or other data with the authors. Abstracts and unpublished studies were also excluded. To identify relevant studies, two reviewers (M.P., M. A-F) independently screened the results of the searches and applied inclusion criteria using a structured form. Discrepancies were resolved through discussion or consultation with two other reviewers (E. V-M, E.V.).

### *Data extraction*

Data extracted from each study included citation information, language of publication, location where research was conducted, time period of the study, study objectives, study design, inclusion/exclusion criteria, definition criteria for HDP, IUGR, SGA, BPD, and BPD-PH, patient characteristics, and results (including raw numbers or summary statistics when raw numbers were not available). Outcomes considered in meta-analysis were: 1) BPD28, defined as oxygen requirement on postnatal day 28; 2) BPD36, defined as oxygen requirement at the postmenstrual age (PMA) of 36 weeks; 3) BPD36 or death; 4) Severe BPD, defined as need for  $\geq$  30% oxygen and/or positive pressure at 36 weeks PMA; 5) BPD-associated PH, defined by any echocardiographic criteria as long as the evaluation was performed at a postnatal age >4 weeks. Any definition of HDP or SGA/IUGR was accepted but we performed sub-group analysis based on the different definitions. When a study used more than one definition criteria for growth restriction, definitions based on assessment of fetal growth prevailed over definitions based on BW. When a study used different BW threshold percentiles to define SGA, data from the lowest percentile were included. When a study did not specify the threshold percentile used, it was grouped together with the studies that used the 10<sup>th</sup> percentile.

### *Statistical analysis*

Studies were combined and analyzed using COMPREHENSIVE META-ANALYSIS V3.0 software (Biostat Inc., Englewood, NJ, USA). For dichotomous outcomes, the odds ratio (OR) with 95% confidence interval (CI) was calculated from the data provided in the studies. Reported OR were included when studies reported them and did not include the numerical data for its calculation. For continuous outcomes (example: gestational age), the mean difference (MD) with 95% CI was calculated. When studies reported continuous variables as median and range or interquartile range, we estimated the mean and standard deviation using the method of Wan et al. and the calculator they provided.<sup>2</sup>

Due to anticipated heterogeneity, summary statistics were calculated with a random-effects model. This model accounts for variability between studies as well as within studies. Subgroup analyses were conducted according to the mixed-effects model.<sup>3</sup> In this model, a random-effects model is used to combine studies within each subgroup, and a fixed-effect model is used to combine subgroups and yield the overall effect. The study-to-study variance (tau-squared) is not assumed to be the same for all subgroups. This value is computed within subgroups and not pooled across subgroups. Statistical heterogeneity was assessed by Cochran's  $Q$  statistic and by the  $I^2$  statistic, which is derived from  $Q$  and describes the proportion of total variation that is due to heterogeneity beyond chance.<sup>4</sup> The  $I^2$  statistic was interpreted as follows: low heterogeneity ( $25\% \leq I^2 < 50\%$ ), moderate heterogeneity ( $50\% \leq I^2 < 75\%$ ), and high heterogeneity ( $I^2 \geq 75\%$ ). We used the Egger's regression test and funnel plots to assess publication bias. A probability value of less than 0.05 (0.10 for heterogeneity) was considered statistically significant.

Potential sources of heterogeneity were assessed through subgroup analysis and/or random effects (method of moments) univariate meta-regression analysis.<sup>5</sup> For continuous covariates (examples: mean gestational age of the cohort, difference in mean gestational age between infants exposed and unexposed to HDP) we used meta-regression analyses to test whether there was a significant relationship between the covariate and effect size, as indicated by a Z-value and an associated p-value. Meta-regression coefficient indicates the change in the log of the OR of the association between BPD and the corresponding exposure for a unit change in the predictor covariate. Subgroups were compared using meta-regression for categorical covariates. For both categorical and continuous covariates, the  $R^2$  analog, defined as the total between-study variance explained by the moderator, was calculated based on the meta-regression matrix.<sup>5</sup> Covariates defined a priori were: 1) Continuous: mean or median GA of the entire cohort, study time (median year of cohort inclusion), differences between exposed and unexposed infants on GA, sex, rate of use of antenatal corticosteroids, and rate of respiratory distress syndrome (RDS); 2) Categorical: HDP type, SGA/IUGR type, study included only infants with GA<28 weeks (yes/no), DM of GA between exposed and unexposed infants statistically significant ( $P < 0.05$ , yes/no), and geographical location (continent) of the study. The clinical covariates were selected based on their relevance on the pathogenesis of BPD. On the basis of the recommendation of an anonymous reviewer, we added three categorical covariates related to the design of the studies: Prospective vs. Retrospective; Cohort vs. Case-control; and Exposure vs. Outcome as independent variable.

## 2. Results

### 2.1. Supplementary Figures

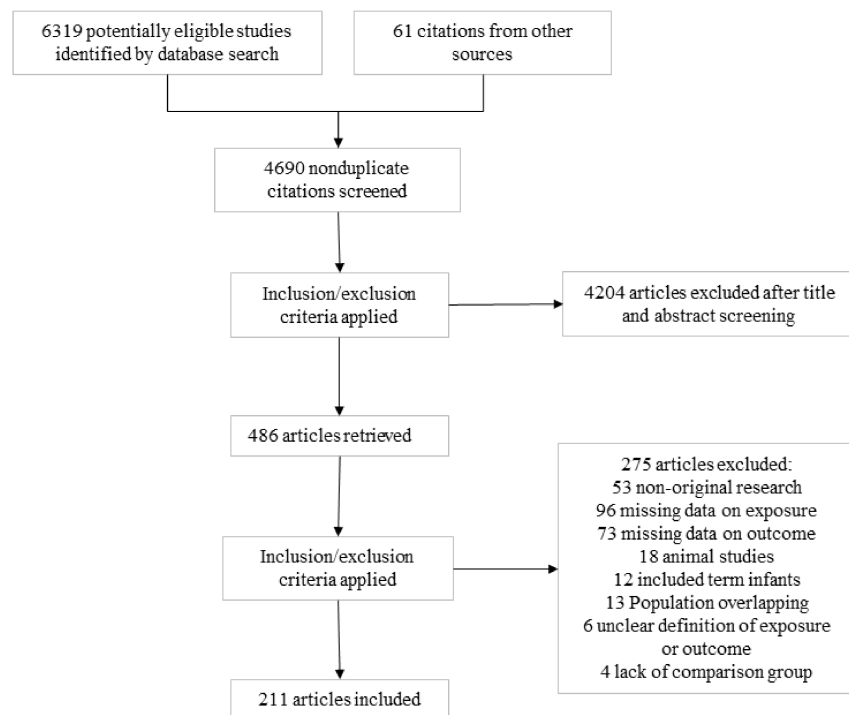

**Supplementary Figure 1.** Flow diagram of the systematic search.

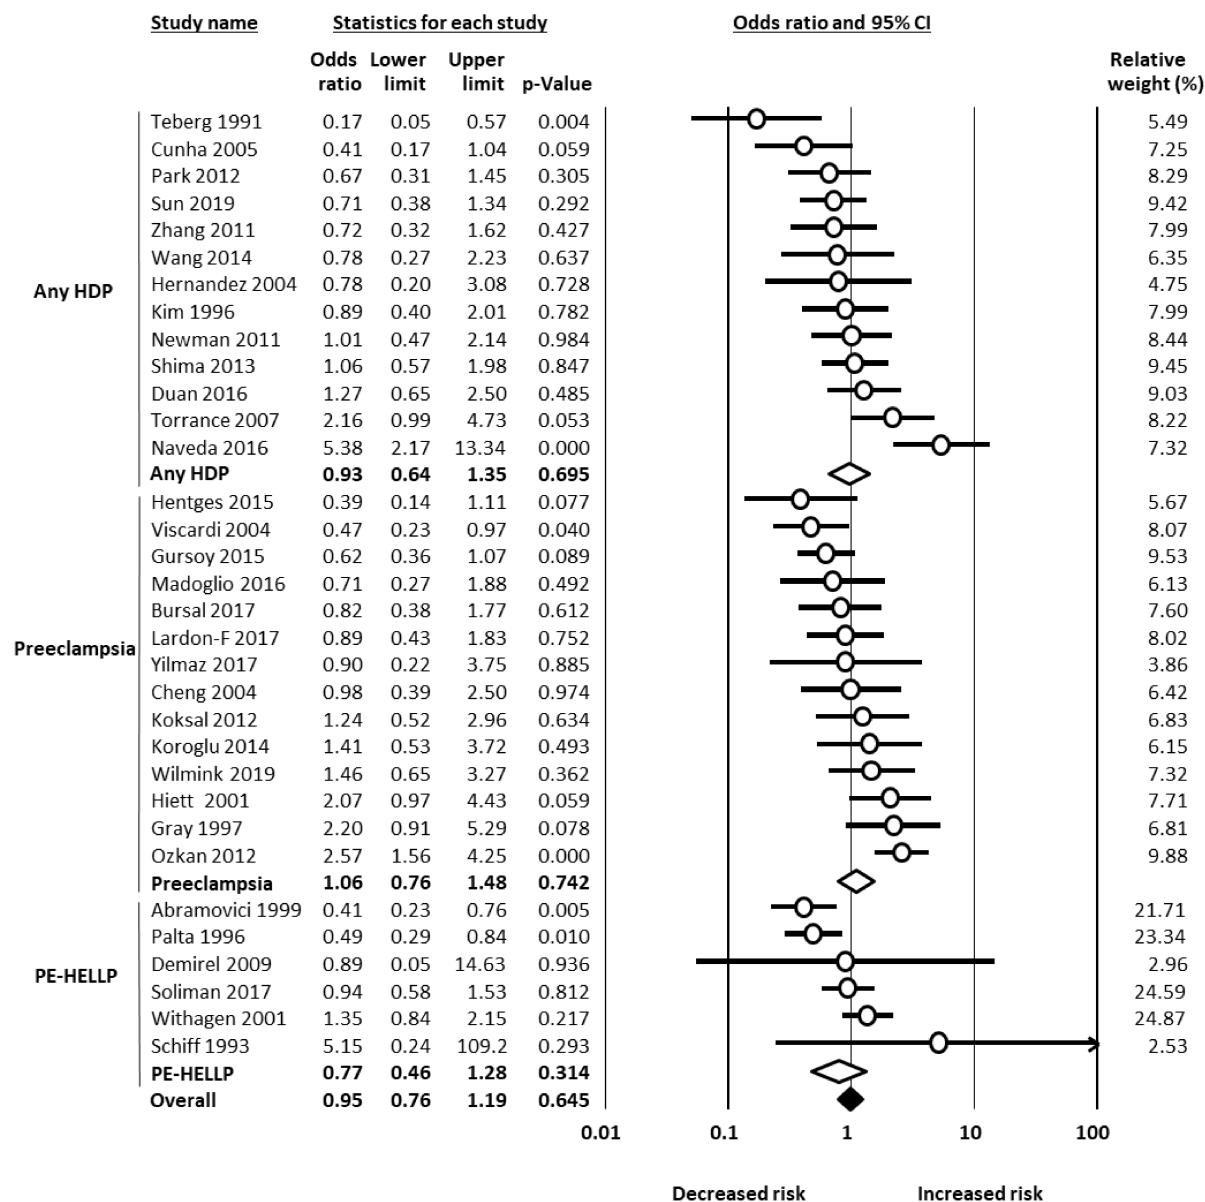

**Supplementary Figure 2.** Meta-analysis of hypertensive disorders of pregnancy (HDP) and bronchopulmonary dysplasia, defined as oxygen requirement on postnatal day 28 (BPD28).

CI: confidence interval; PE: preeclampsia.

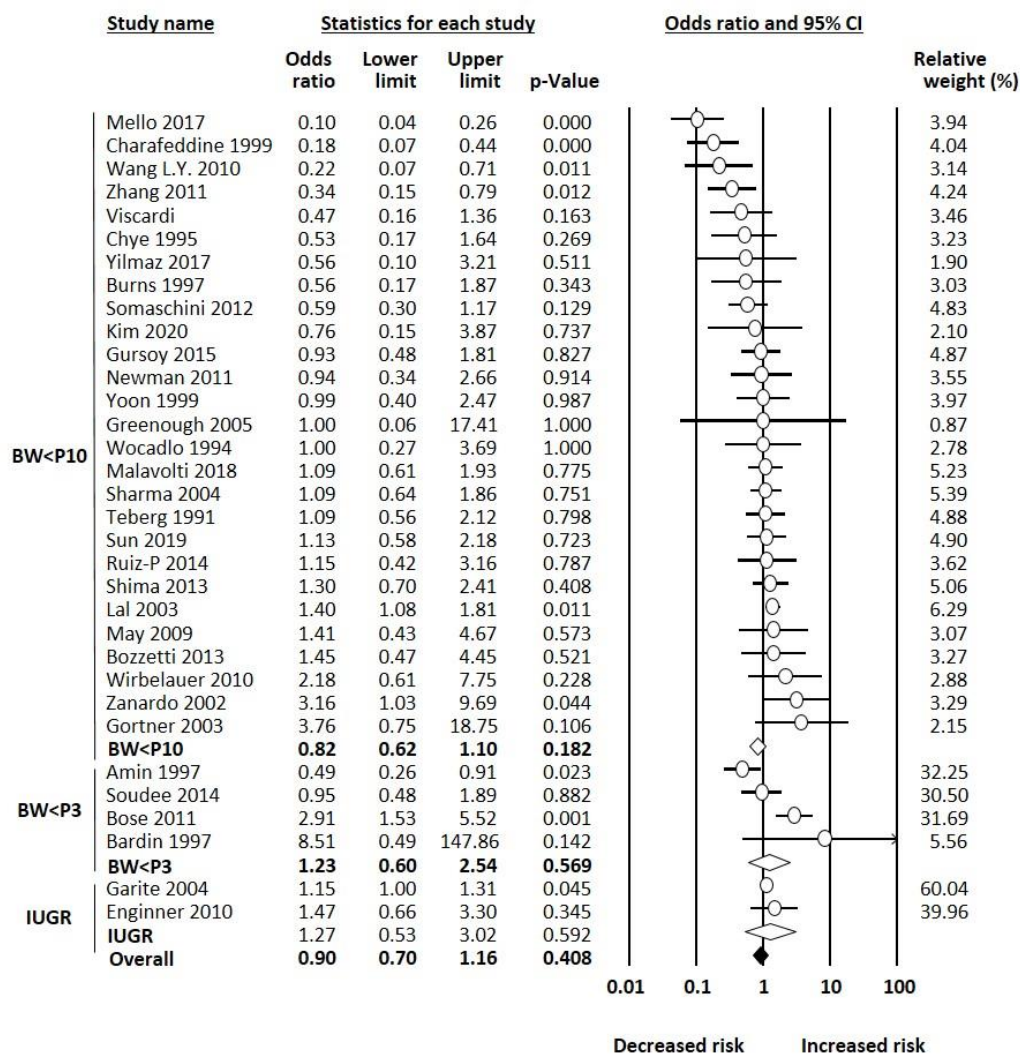

**Supplementary Figure 3.** Meta-analysis of small for gestational age/intrauterine growth restriction and bronchopulmonary dysplasia, defined as oxygen requirement on postnatal day 28 (BPD28).

BW: birth weight; CI: confidence interval; IUGR: intrauterine growth restriction (defined on the basis of fetal growth assessment); P3: 3<sup>rd</sup> percentile; P10: 10<sup>th</sup> percentile.

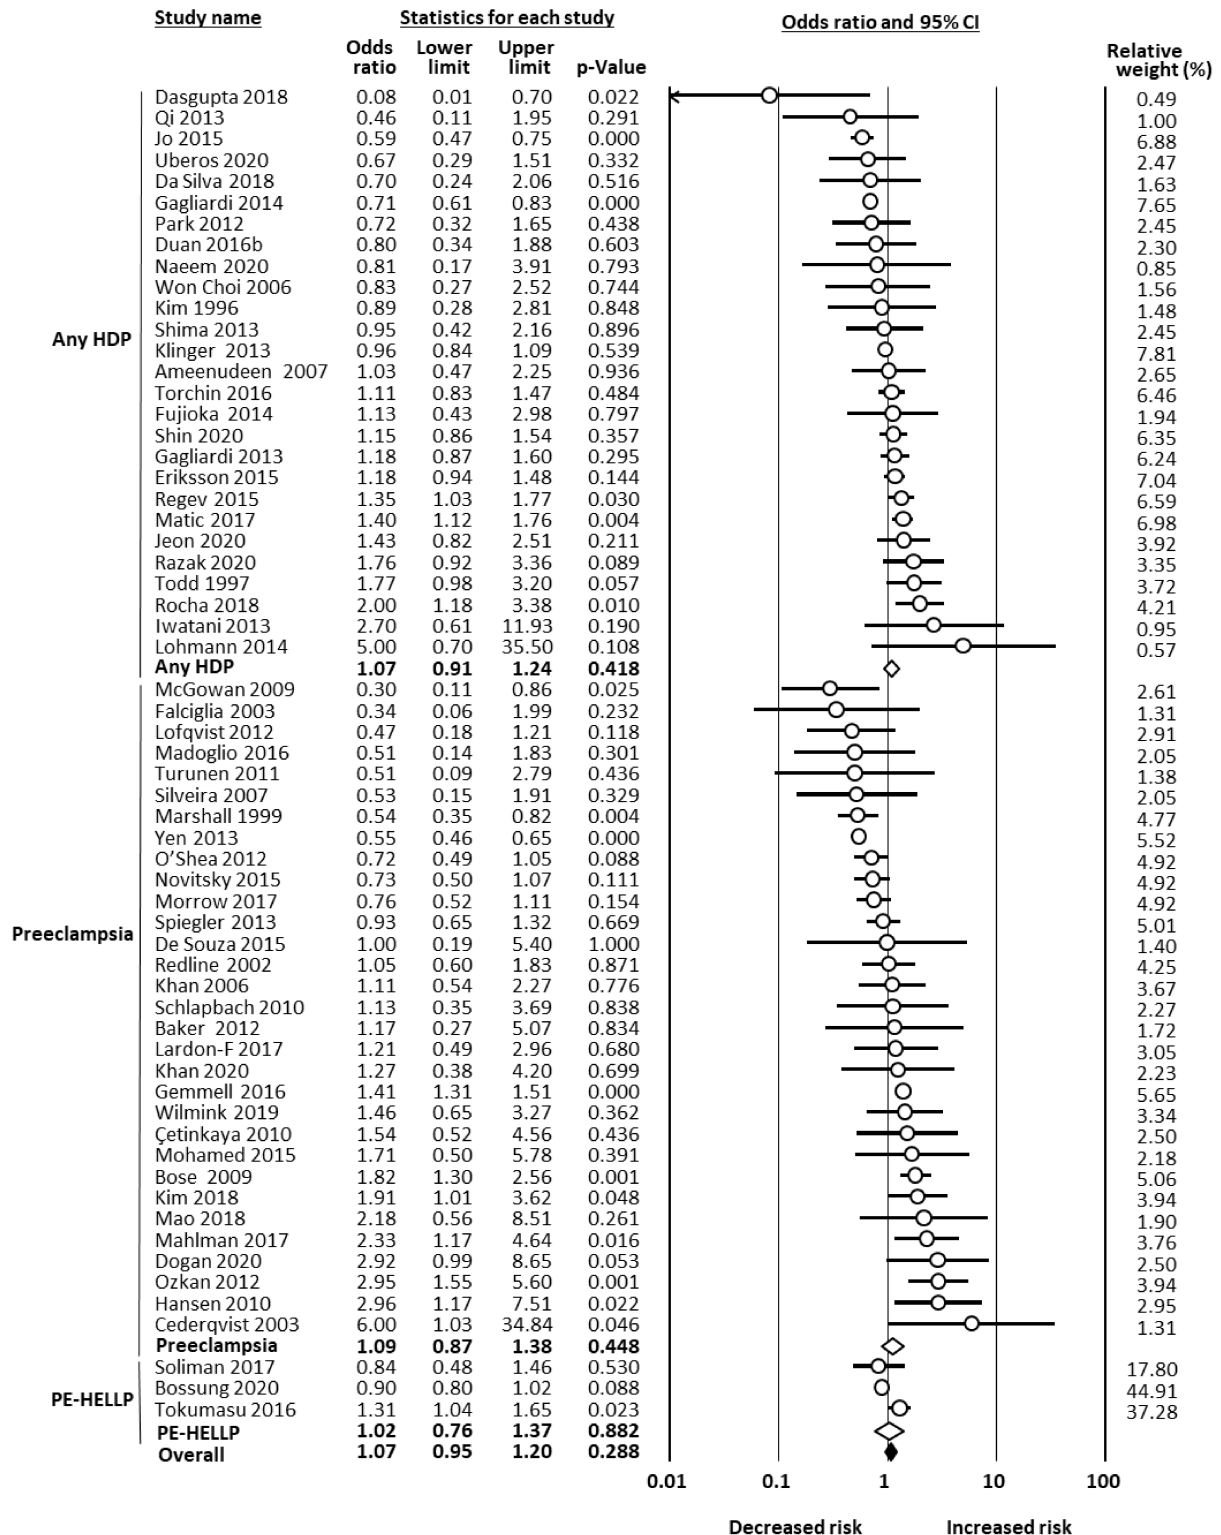

**Supplementary Figure 4.** Meta-analysis of hypertensive disorders of pregnancy (HDP) and bronchopulmonary dysplasia, defined as oxygen requirement at the postmenstrual age of 36 weeks (BPD36).

CI: confidence interval; PE: preeclampsia.



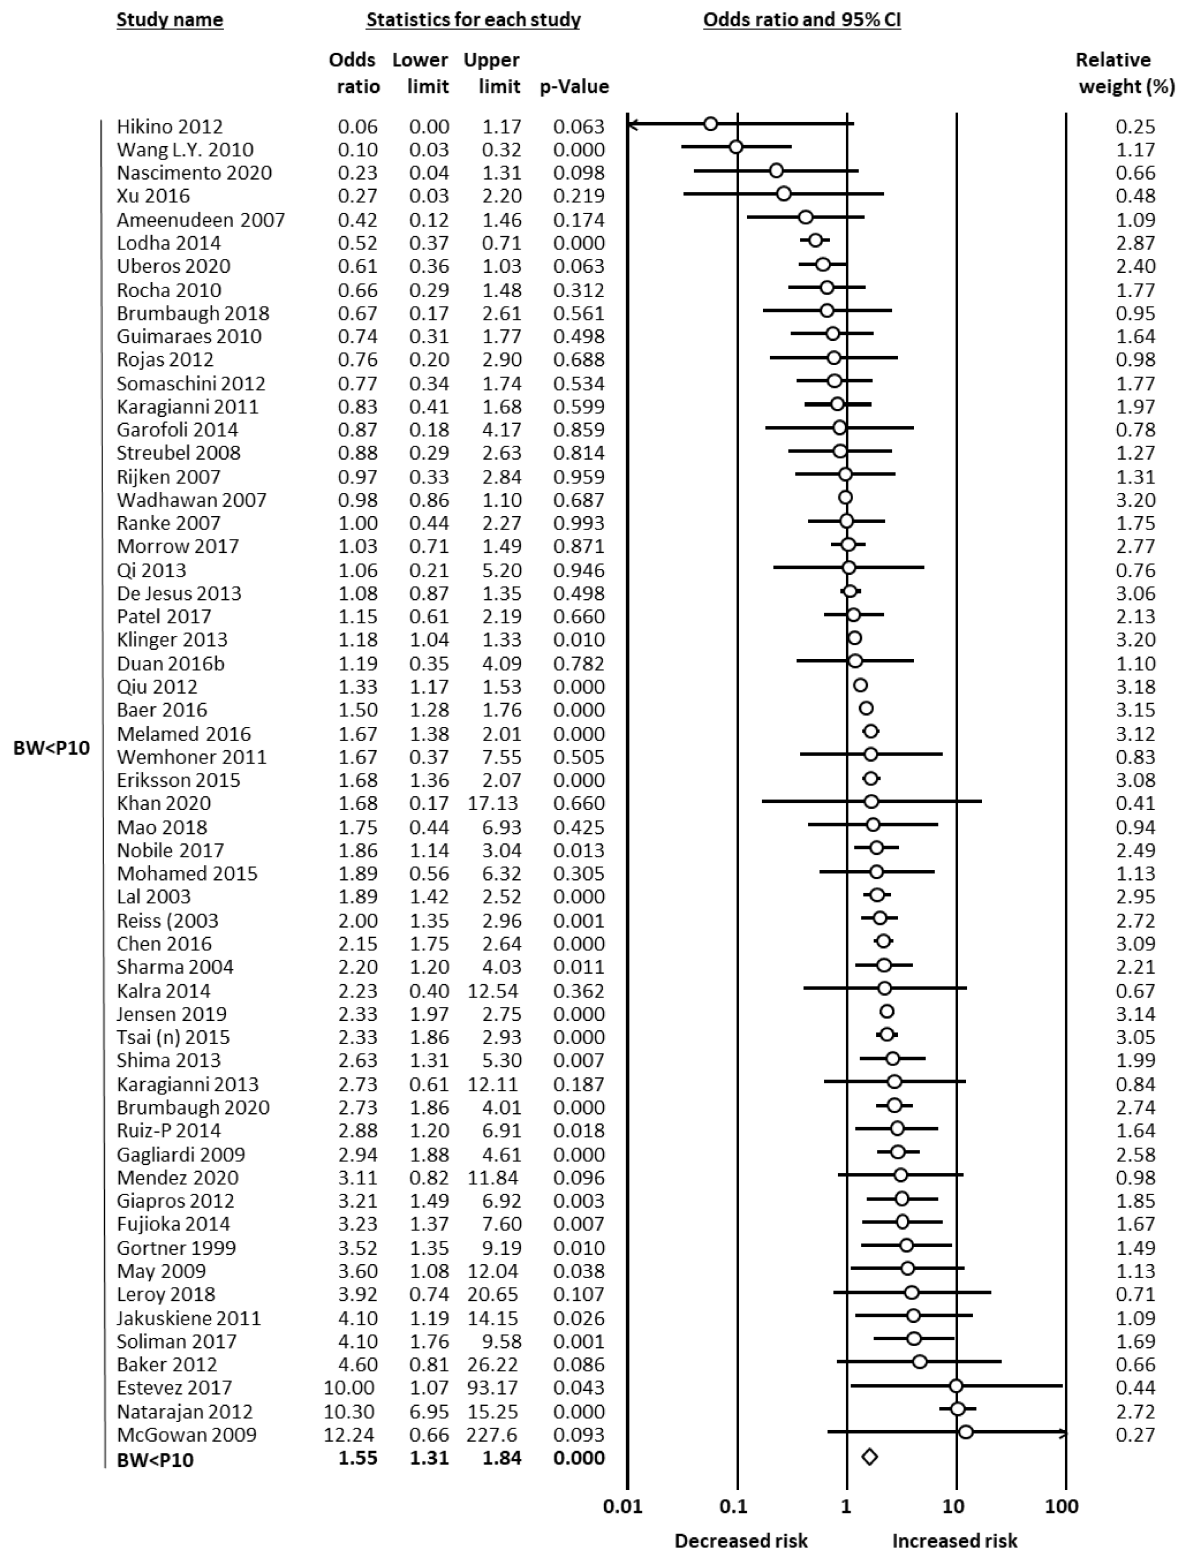

**Supplementary Figure 5.** Meta-analysis of the association between birth weight (BW) below the 10<sup>th</sup> percentile and bronchopulmonary dysplasia, defined as oxygen requirement at the postmenstrual age of 36 weeks (BPD36).

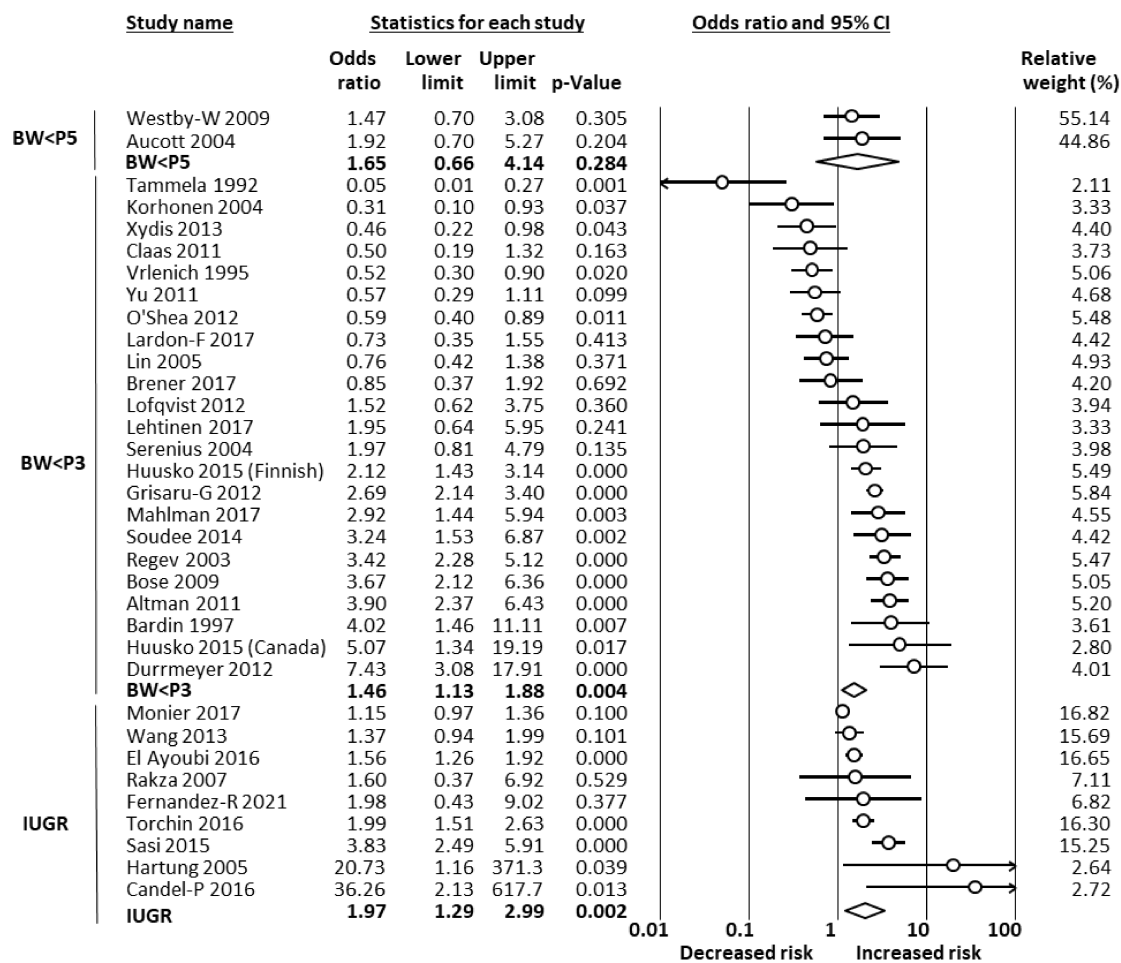

**Supplementary Figure 6.** Meta-analysis of the association between small for gestational age/intrauterine growth restriction and bronchopulmonary dysplasia, defined as oxygen requirement at the postmenstrual age of 36 weeks (BPD36).

BW: birth weight; CI: confidence interval; IUGR: intrauterine growth restriction (defined on the basis of fetal growth assessment); P5: 5<sup>th</sup> percentile; P10: 10<sup>th</sup> percentile.

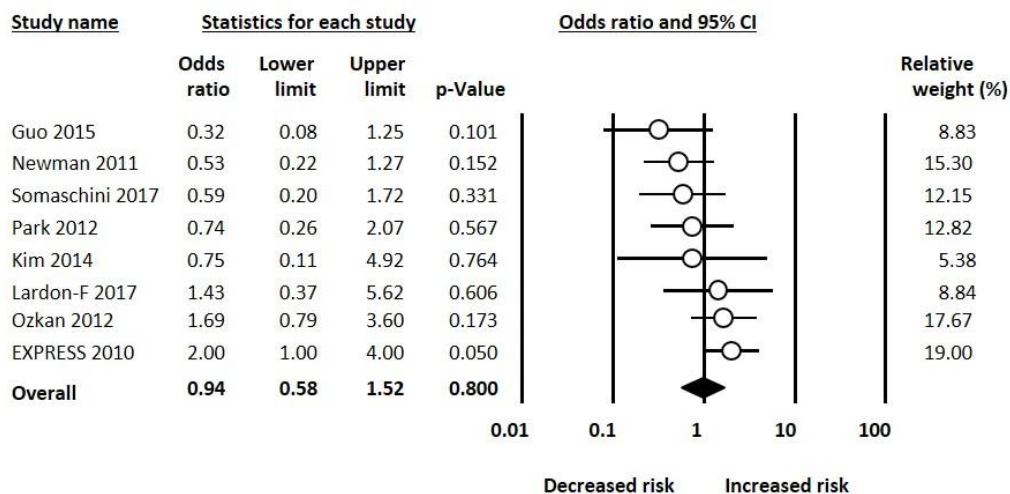

**Supplementary Figure 7.** Meta-analysis of hypertensive disorders of pregnancy and severe bronchopulmonary dysplasia.

CI: confidence interval.

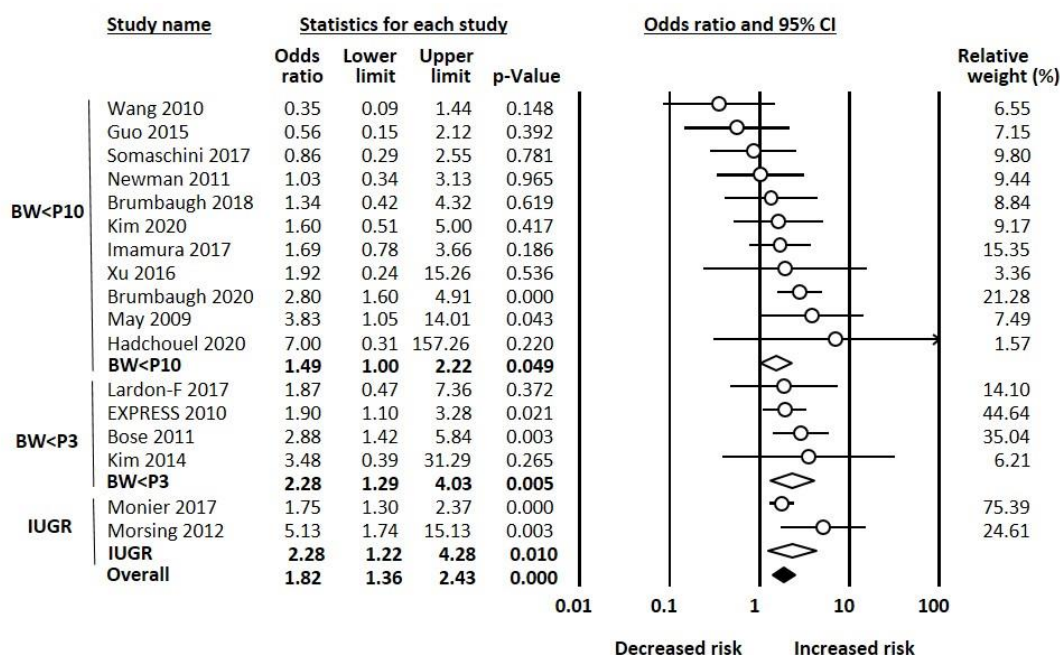

**Supplementary Figure 8.** Meta-analysis of small for gestational age/intrauterine growth restriction and severe bronchopulmonary dysplasia.

BW: birth weight; CI: confidence interval; IUGR: intrauterine growth restriction (defined on the basis of fetal growth assessment); P3: 3<sup>rd</sup> percentile; P10: 10<sup>th</sup> percentile.

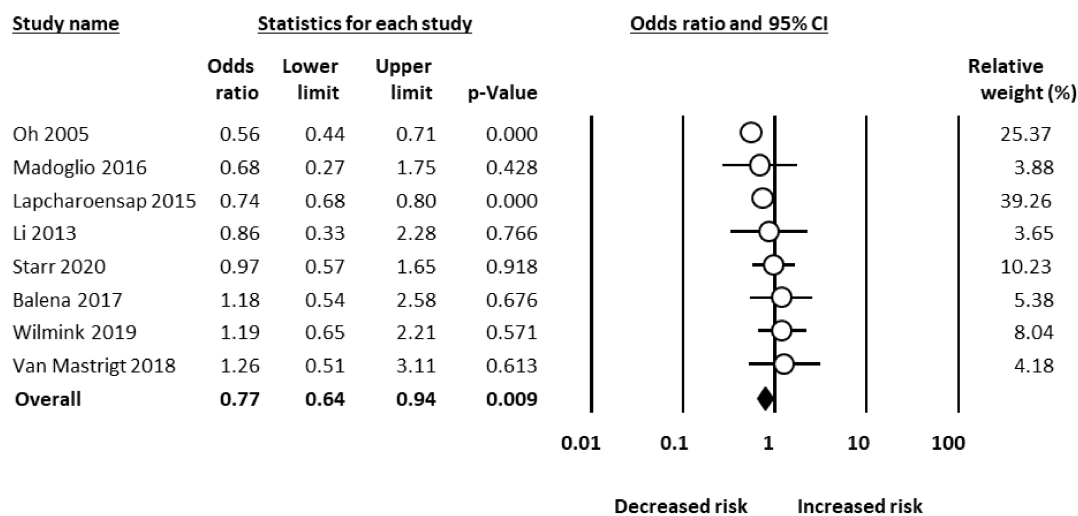

**Supplementary Figure 9.** Meta-analysis of hypertensive disorders of pregnancy and the combined outcome bronchopulmonary dysplasia or death.

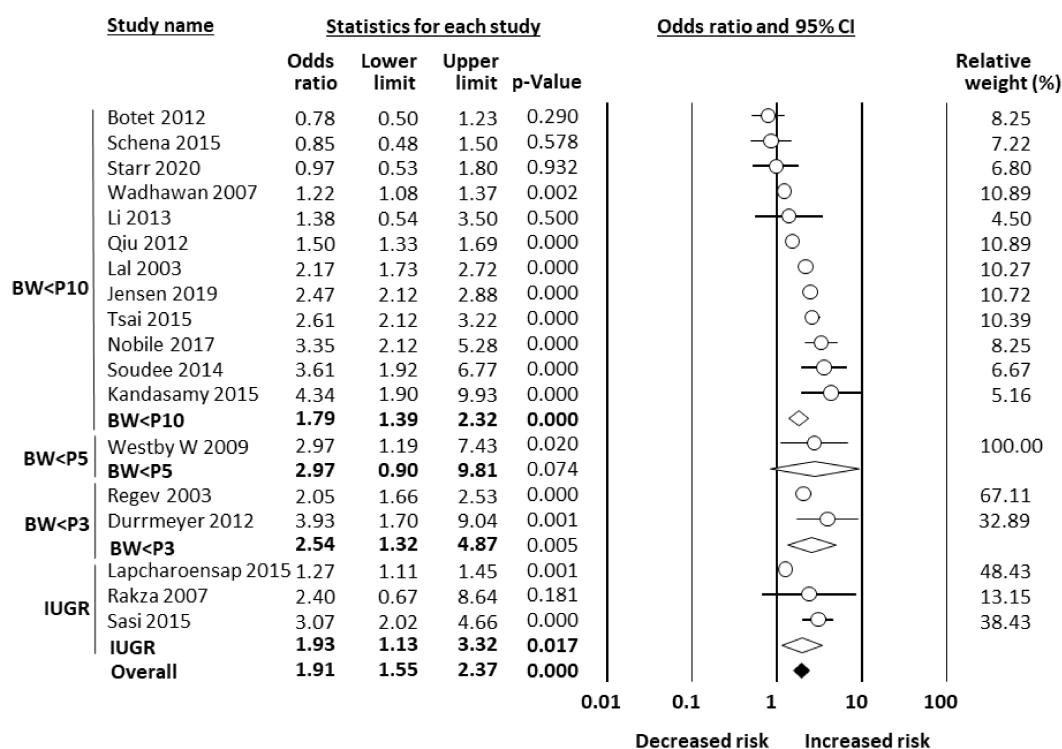

**Supplementary Figure 10.** Meta-analysis of small for gestational age/intrauterine growth restriction and the combined outcome bronchopulmonary dysplasia or death.

BW: birth weight; CI: confidence interval; IUGR: intrauterine growth restriction (defined on the basis of fetal growth assessment); P3: 3<sup>rd</sup> percentile; P5: 5<sup>th</sup> percentile; P10: 10<sup>th</sup> percentile.

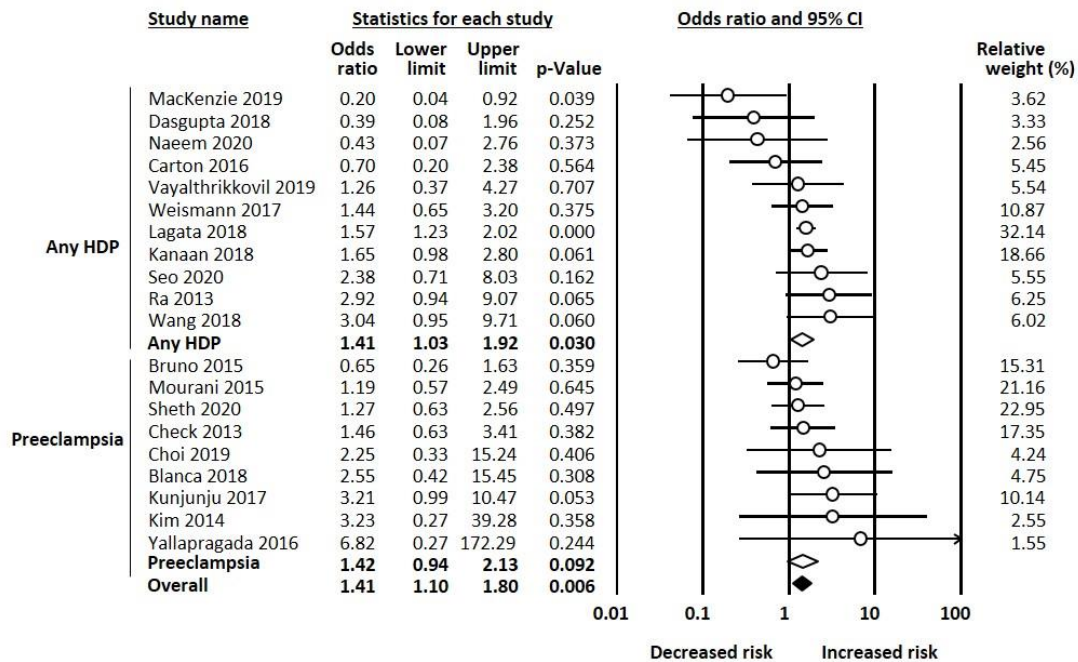

**Supplementary Figure 11.** Meta-analysis of hypertensive disorders of pregnancy (HDP) and bronchopulmonary dysplasia-associated pulmonary hypertension.

CI: confidence interval.

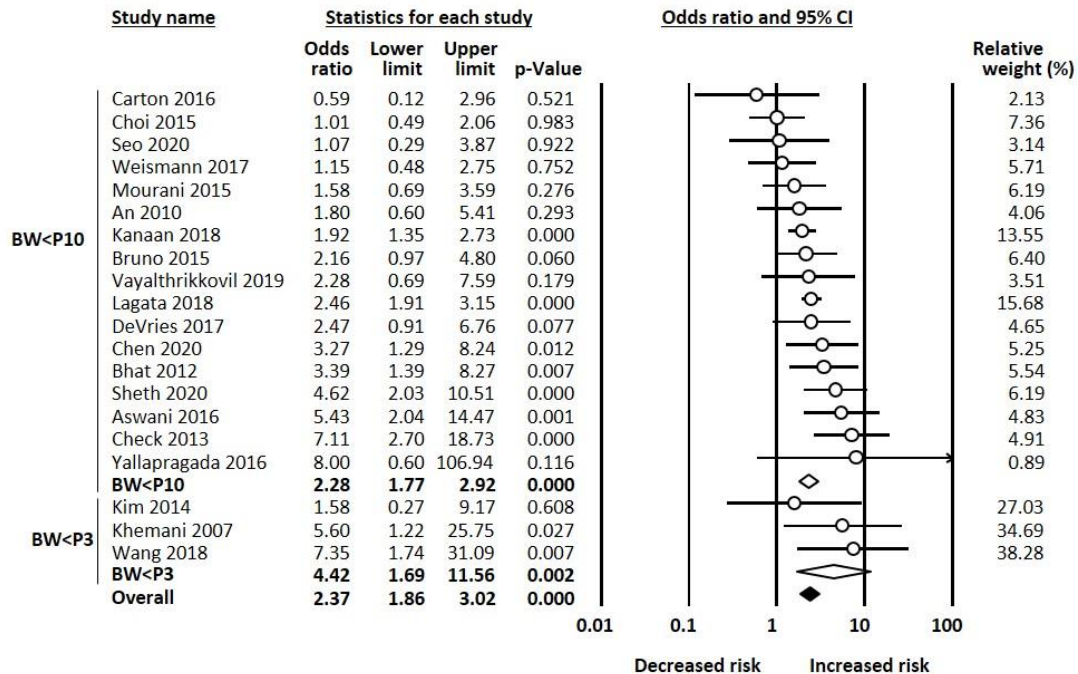

**Supplementary Figure 12.** Meta-analysis of small for gestational age/intrauterine growth restriction and bronchopulmonary dysplasia-associated pulmonary hypertension.

BW: birth weight; CI: confidence interval; IUGR: intrauterine growth restriction (defined on the basis of fetal growth assessment); P3: 3<sup>rd</sup> percentile; P10: 10<sup>th</sup> percentile.

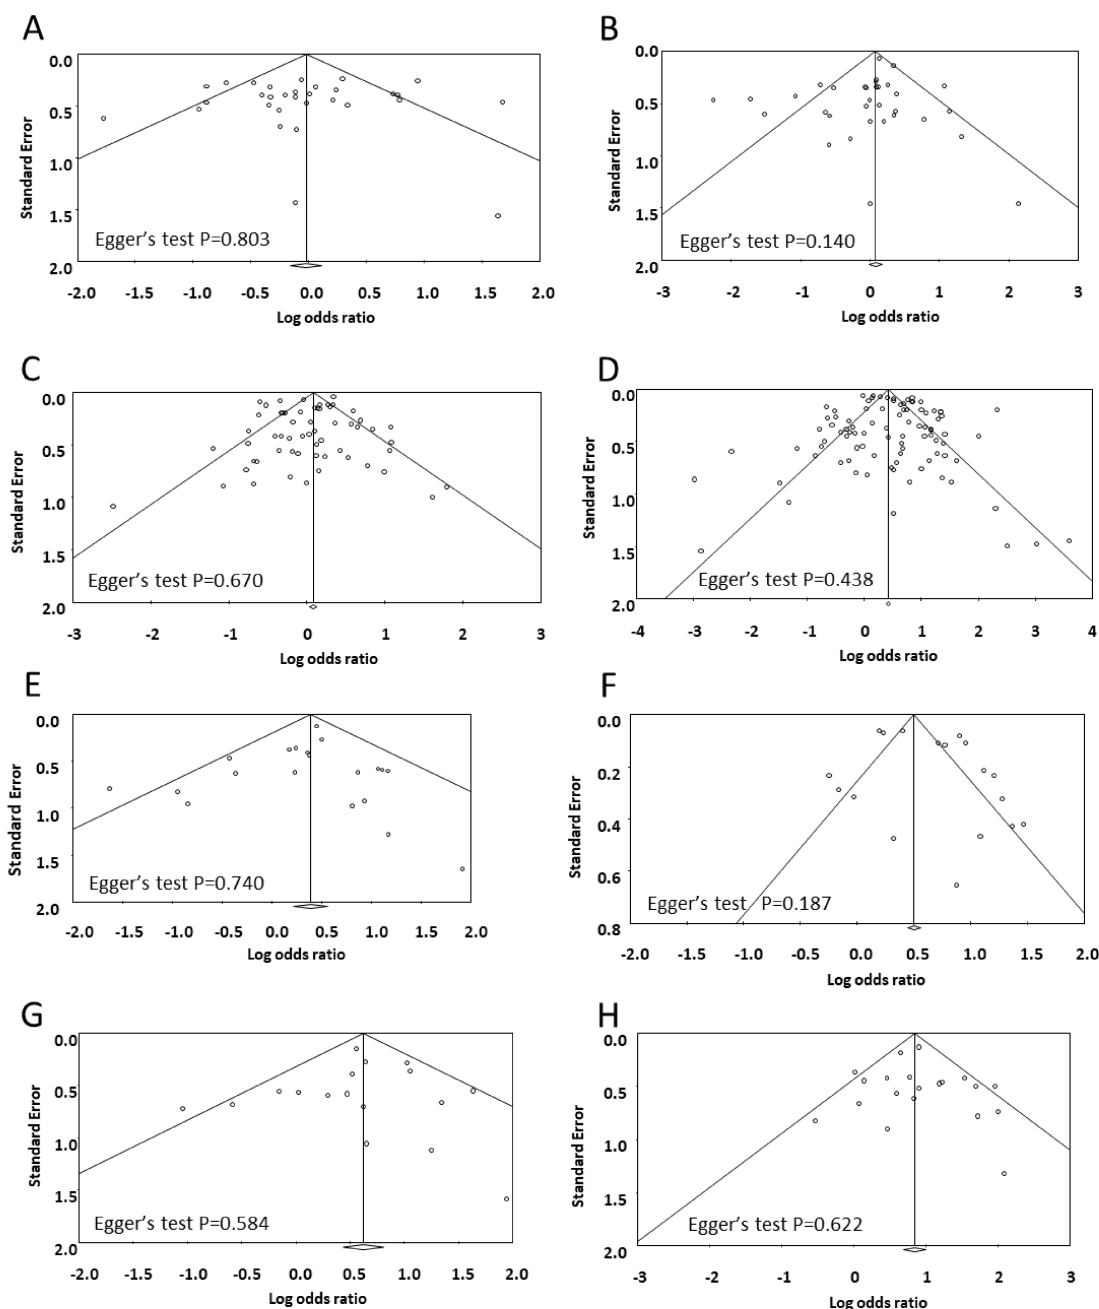

**Supplementary Figure 13.** Funnel plot for publication bias analysis for the studies included in the different meta-analyses.

A: Meta-analysis of hypertensive disorders of pregnancy (HDP) and BPD28. B: Meta-analysis of small for gestational age (SGA)/intrauterine growth restriction (IUGR) and BPD28. C: Meta-analysis of HDP and BPD36. D: Meta-analysis of SGA/IUGR and BPD36. E: Meta-analysis of SGA/IUGR and severe BPD. F: Meta-analysis of SGA/IUGR and BPD or death. G: Meta-analysis of HDP and BPD-associated pulmonary hypertension. H: Meta-analysis of SGA/IUGR and BPD-associated pulmonary hypertension.

**Supplementary Table 1. Characteristics of the included studies**

| First author, year            | Country         | Design | Prospective? | Total infants | Centers | GA of cohort (weeks) | Independent variable | Exposures         | Outcomes (% of incidence in total group) | NOS Selection | NOS Comparability | NOS Outcome/Exposure | NOS Total |
|-------------------------------|-----------------|--------|--------------|---------------|---------|----------------------|----------------------|-------------------|------------------------------------------|---------------|-------------------|----------------------|-----------|
| Abramovici, 1999 <sup>6</sup> | USA             | cohort | no           | 2524          | 1       | <36                  | Exposure             | PE-HELLP          | BPD28 (64)                               | 3             | 1                 | 3                    | 7         |
| Altman, 2011 <sup>7</sup>     | Sweden          | Cohort | yes          | 6674          | Network | 33.1                 | Exposure             | BW<P3             | BPD36 (1)                                | 4             | 1                 | 3                    | 8         |
| Ameenudeen, 2007 <sup>8</sup> | Malaysia        | Cohort | yes          | 244           | 1       | 29.7                 | Outcome              | Any HDP<br>BW<P10 | BPD36 (15)                               | 4             | 2                 | 3                    | 9         |
| Amin, 1997 <sup>9</sup>       | Canada          | Ca-Co  | no           | 186           | 1       | 28.3                 | Exposure             | BW<P3             | BPD28 (54)                               | 4             | 1                 | 3                    | 8         |
| An, 2010 <sup>10</sup>        | Korea           | Cohort | no           | 116           | 1       | 26.3                 | Outcome              | BW<P10            | BPD-PH (25)                              | 4             | 1                 | 3                    | 8         |
| Aswani, 2016 <sup>11</sup>    | USA             | Cohort | No           | 230           | 1       | 25.9                 | Outcome              | BW<P10            | BPD-PH (8)                               | 4             | 1                 | 3                    | 8         |
| Aucott, 2004 <sup>12</sup>    | USA             | Ca-Co  | no           | 95            | 1       | 28.4                 | Exposure             | BW<P5             | BPD36 (21)                               | 4             | 1                 | 3                    | 8         |
| Baer, 2016 <sup>13</sup>      | USA             | Cohort | no           | 78647         | Network | 33.0                 | Exposure             | BW<P10            | BPD36 (2)                                | 4             | 1                 | 3                    | 8         |
| Baker, 2012 <sup>14</sup>     | USA             | cohort | yes          | 62            | 1       | 31.6                 | Outcome              | PE<br>BW<P10      | BPD36 (21)                               | 4             | 1                 | 3                    | 8         |
| Balena, 2017 <sup>15</sup>    | USA             | cohort | yes          | 113           | 1       | 27.9                 | Outcome              | Any HDP           | BPD/Death (36)                           | 4             | 2                 | 3                    | 9         |
| Bardin, 1997 <sup>16</sup>    | Canada          | Cohort | yes          | 115           | 1       | 25.3                 | Exposure             | BW<P3             | BPD28 (86)<br>BPD36 (37)                 | 3             | 1                 | 3                    | 7         |
| Bhat, 2012 <sup>17</sup>      | USA             | Cohort | yes          | 145           | 1       | 26                   | Outcome              | BW<P10            | BPD-PH (18)                              | 4             | 2                 | 3                    | 9         |
| Blanca, 2018 <sup>18</sup>    | The Netherlands | Cohort | yes          | 69            | 1       | 25.6                 | Outcome              | PE                | BPD-PH (12)                              | 3             | 1                 | 3                    | 7         |
| Bose, 2009 <sup>19</sup>      | USA             | Cohort | yes          | 1241          | 14      | <28                  | Outcome              | PE<br>BW<P3       | BPD36 (52)                               | 4             | 2                 | 3                    | 9         |
| Bose, 2011 <sup>20</sup>      | USA             | Cohort | yes          | 932           | 14      | <28                  | Outcome              | BW<P3             | BPD28 (52)<br>sBPD (11)                  | 4             | 2                 | 3                    | 9         |
| Bossung, 2020 <sup>21</sup>   | Germany         | Cohort | yes          | 16035         | 62      | 28.2                 | Exposure             | PE-HELLP          | BPD36 (15)                               | 4             | 2                 | 3                    | 9         |
| Botet, 2012 <sup>22</sup>     | Spain           | Cohort | no           | 415           | 1       | 27.0                 | Outcome              | BW<P10            | BPD/Death (28)                           | 4             | 2                 | 3                    | 9         |
| Bozzetti, 2013 <sup>23</sup>  | Italy           | Cohort | yes          | 310           | 1       | 29.7                 | Exposure             | BW<P10            | BPD28 (9)                                | 4             | 2                 | 3                    | 9         |

| First author, year               | Country         | Design | Prospective? | Total infants | Centers | GA of cohort (weeks) | Independent variable | Exposures         | Outcomes (% of incidence in total group) | NOS Selection | NOS Comparability | NOS Outcome/Exposure | NOS Total |
|----------------------------------|-----------------|--------|--------------|---------------|---------|----------------------|----------------------|-------------------|------------------------------------------|---------------|-------------------|----------------------|-----------|
| Brener, 2017 <sup>24</sup>       | Argentina       | Cohort | no           | 203           | 1       | 29.4                 | Outcome              | BW<P3             | BPD36 (22)                               | 4             | 2                 | 3                    | 9         |
| Brumbaugh, 2018 <sup>25</sup>    | USA             | Cohort | no           | 151           | 1       | 26.6                 | Outcome              | BW<P10            | BPD36 (83)<br>sBPD (55)                  | 4             | 2                 | 3                    | 9         |
| Brumbaugh, 2020 <sup>26</sup>    | USA             | Cohort | yes          | 2310          | Network | 24.9                 | Outcome              | BW<P10            | BPD36 (48)<br>sBPD (5)                   | 4             | 2                 | 3                    | 9         |
| Bruno, 2015 <sup>27</sup>        | USA             | Cohort | no           | 303           | 1       | 26.6                 | Outcome              | PE<br>BW<P10      | BPD-PH (12)                              | 4             | 2                 | 3                    | 9         |
| Burns, 1997 <sup>28</sup>        | Australia       | Ca-Co  | no           | 117           | 5       | 28.2                 | Outcome              | BW<P10            | BPD28 (55)                               | 4             | 2                 | 3                    | 9         |
| Bursal, 2017 <sup>29</sup>       | Turkey          | cohort | no           | 284           | 1       | 31.2                 | Exposure             | PE                | BPD28 (10)                               | 2             | 1                 | 3                    | 7         |
| Candel, 2016 <sup>30</sup>       | Spain           | Ca-Co  | yes          | 129           | 1       | 33.8                 | Exposure             | IUGR              | BPD36 (13)                               | 4             | 1                 | 3                    | 8         |
| Cartón, 2016 <sup>31</sup>       | Spain           | Cohort | yes          | 84            | 1       | 27.0                 | Outcome              | Any HDP<br>BW<P10 | BPD-PH (26)                              | 4             | 2                 | 3                    | 9         |
| Cederqvist, 2003 <sup>32</sup>   | Finland         | cohort | yes          | 32            | 1       | 27.8                 | Outcome              | PE                | BPD36 (56)                               | 4             | 1                 | 3                    | 8         |
| Çetinkaya, 2010 <sup>33</sup>    | Turkey          | Ca-Co  | no           | 84            | 1       | 31.3                 | Exposure             | PE                | BPD36 (23)                               | 2             | 1                 | 3                    | 6         |
| Charafeddine, 1999 <sup>34</sup> | USA             | Cohort | yes          | 123           | 1       | 27.8                 | Outcome              | BW<P10            | BPD28 (72)                               | 4             | 2                 | 3                    | 9         |
| Check, 2013 <sup>35</sup>        | USA             | Cohort | no           | 138           | 1       | 26.1                 | Outcome              | PE<br>BW<P10      | BPD-PH (28)                              | 3             | 1                 | 3                    | 7         |
| Chen, 2020 <sup>36</sup>         | USA             | Cohort | yes          | 188           | 1       | 26.7                 | Outcome              | BW<P10            | BPD-PH (32)                              | 4             | 2                 | 3                    | 9         |
| Chen, 2016 <sup>37</sup>         | Switzerland     | Cohort | yes          | 8899          | Network | 29.2                 | Outcome              | BW<P10            | BPD36 (10)                               | 4             | 2                 | 3                    | 9         |
| Cheng, 2004 <sup>38</sup>        | Taiwan          | Ca-Co  | no           | 89            | 1       | 28.3                 | Exposure             | PE                | BPD28 (36)                               | 4             | 1                 | 2                    | 7         |
| Choi, 2015 <sup>39</sup>         | Korea           | Cohort | no           | 194           | 1       | 26.5                 | Outcome              | BW<P10            | BPD-PH (26)                              | 4             | 1                 | 3                    | 8         |
| Choi, 2019 <sup>40</sup>         | Korea           | Cohort | no           | 81            | 1       | 25.7                 | Outcome              | PE                | BPD-PH (25)                              | 4             | 1                 | 3                    | 8         |
| Chye, 1995 <sup>41</sup>         | Australia       | Ca-Co  | yes          | 156           | 1       | 28.4                 | Outcome              | BW<P10            | BPD28 (50)                               | 4             | 1                 | 3                    | 8         |
| Claas, 2011 <sup>42</sup>        | The Netherlands | Cohort | no           | 101           | 1       | 28.0                 | Exposure             | BW<P3             | BPD36 (56)                               | 4             | 1                 | 3                    | 8         |



| First author, year                      | Country | Design | Prospective? | Total infants | Centers | GA of cohort (weeks) | Independent variable | Exposures         | Outcomes (% of incidence in total group) | NOS Selection | NOS Comparability | NOS Outcome/Exposure | NOS Total |
|-----------------------------------------|---------|--------|--------------|---------------|---------|----------------------|----------------------|-------------------|------------------------------------------|---------------|-------------------|----------------------|-----------|
| Cunha, 2005 <sup>43</sup>               | Brazil  | cohort | yes          | 86            | 1       | 28.9                 | Outcome              | Any HDP           | BPD28 (52)                               | 4             | 1                 | 3                    | 8         |
| Da Silva, 2018 <sup>44</sup>            | Brazil  | Cohort | yes          | 67            | 3       | 29.1                 | Outcome              | Any HDP           | BPD36 (33)                               | 4             | 2                 | 3                    | 9         |
| Dasgupta, 2018 <sup>45</sup>            | USA     | Cohort | yes          | 52            | 1       | 26.6                 | Outcome              | Any HDP           | BPD36 (69)<br>BPD-PH (15)                | 4             | 2                 | 3                    | 9         |
| De Jesus, 2013 <sup>46</sup>            | USA     | Cohort | no           | 2971          | Network | 25.0                 | Exposure             | BW<P10            | BPD36 (36)                               | 4             | 2                 | 3                    | 9         |
| De Souza, 2015 <sup>47</sup>            | Brazil  | Ca-Co  | yes          | 60            | 1       | 30.0                 | Exposure             | PE                | BPD36 (10)                               | 4             | 2                 | 3                    | 9         |
| Demirel, 2009 <sup>48</sup>             | Turkey  | Ca-Co  | yes          | 106           | 1       | 30.4                 | Outcome              | PE-HELLP          | BPD28 (53)                               | 4             | 2                 | 3                    | 9         |
| DeVries, 2017 <sup>49</sup>             | USA     | Cohort | no           | 577           | 1       | 26.6                 | Outcome              | BW<P10            | BPD-PH (3)                               | 4             | 2                 | 2                    | 8         |
| Dogan, 2020 <sup>50</sup>               | Turkey  | Cohort | no           | 78            | 1       | 28.6                 | Outcome              | PE                | BPD36 (41)                               | 4             | 1                 | 3                    | 8         |
| Duan, 2016 <sup>51</sup>                | China   | Cohort | yes          | 243           | 1       | 30.0                 | Outcome              | Any HDP           | BPD28 (29)                               | 4             | 2                 | 3                    | 9         |
| Duan, 2016b <sup>52</sup>               | China   | Cohort | yes          | 147           | 1       | 29.5                 | Outcome              | Any HDP<br>BW<P10 | BPD36 (41)                               | 4             | 2                 | 3                    | 9         |
| Durrmeyer, 2012 <sup>53</sup>           | France  | Cohort | yes          | 265           | 1       | 26.0                 | Outcome              | BW<P3             | BPD36 (15)<br>BPD/Death (25)             | 4             | 1                 | 3                    | 8         |
| El Ayoub, 2016 <sup>54</sup>            | Europe  | Cohort | yes          | 4585          | Network | 28.0                 | Exposure             | IUGR              | BPD36 (14)                               | 4             | 2                 | 3                    | 9         |
| Enginner, 2010 <sup>55</sup>            | UK      | Ca-Co  | no           | 121           | 1       | <36                  | Exposure             | IUGR              | BPD28 (29)                               | 4             | 1                 | 3                    | 8         |
| Eriksson, 2015 <sup>56</sup>            | Sweden  | Ca-Co  | no           | 2255          | Network | 30.0                 | Outcome              | Any HDP<br>BW<P10 | BPD36 (24)                               | 4             | 2                 | 3                    | 9         |
| Estevez, 2017 <sup>57</sup>             | Spain   | Cohort | no           | 110           | 1       | 29.2                 | Exposure             | BW<P10            | BPD36 (5)                                | 4             | 1                 | 3                    | 8         |
| EXPRESS group, 2010 <sup>58</sup>       | Sweden  | Cohort | yes          | 497           | Network | 25.0                 | Outcome              | PE<br>BW<P3       | sBPD (25)                                | 4             | 2                 | 3                    | 9         |
| Falciglia, 2003 <sup>59</sup>           | USA     | Cohort | yes          | 46            | 1       | 29.5                 | Exposure             | PE                | BPD36 (50)                               | 3             | 2                 | 3                    | 8         |
| Fernandez-Rodriguez, 2021 <sup>60</sup> | Spain   | Cohort | no           | 95            | 1       | 31.4                 | Exposure             | IUGR              | BPD36 (9)                                | 3             | 2                 | 3                    | 8         |
| Fujioka, 2014 <sup>61</sup>             | Japan   | Cohort | no           | 97            | 1       | 28.0                 | Outcome              | Any HDP           | BPD36 (57)                               | 4             | 1                 | 3                    | 8         |

| First author, year            | Country       | Design | Prospective? | Total infants | Centers | GA of cohort (weeks) | Independent variable | Exposures         | Outcomes (% of incidence in total group) | NOS Selection | NOS Comparability | NOS Outcome/Exposure | NOS Total |
|-------------------------------|---------------|--------|--------------|---------------|---------|----------------------|----------------------|-------------------|------------------------------------------|---------------|-------------------|----------------------|-----------|
|                               |               |        |              |               |         |                      |                      | BW<P10            |                                          |               |                   |                      |           |
| Gagliardi, 2009 <sup>62</sup> | Italy         | Cohort | yes          | 1209          | 14      | 28.7                 | Outcome              | BW<P10            | BPD36 (16)                               | 4             | 2                 | 3                    | 9         |
| Gagliardi, 2013 <sup>63</sup> | Italy         | Cohort | yes          | 2085          | Network | 28.7                 | Exposure             | Any HDP           | BPD36 (13)                               | 4             | 2                 | 3                    | 9         |
| Gagliardi, 2014 <sup>64</sup> | Italy         | Cohort | no           | 3606          | 82      | 27.2                 | Exposure             | Any HDP           | BPD36 (25)                               | 4             | 2                 | 3                    | 9         |
| Garite, 2004 <sup>65</sup>    | USA           | Cohort | no           | 24249         | 124     | 29.9                 | Exposure             | IUGR              | BPD28 (18)                               | 3             | 2                 | 3                    | 8         |
| Garofoli, 2014 <sup>66</sup>  | Italy         | Cohort | no           | 76            | 1       | 31.7                 | Exposure             | BW<P10            | BPD36 (9)                                | 4             | 1                 | 3                    | 8         |
| Gemmell, 2016 <sup>67</sup>   | International | Cohort | no           | 27846         | Network | 26.5                 | Exposure             | PE                | BPD36 (35)                               | 4             | 2                 | 3                    | 9         |
| Giapros, 2012 <sup>68</sup>   | Greece        | Cohort | no           | 168           | 1       | 28.5                 | Exposure             | BW<P10            | BPD36 (35)                               | 4             | 2                 | 3                    | 9         |
| Gortner, 1999 <sup>69</sup>   | Germany       | Cohort | yes          | 317           | 6       | 29.6                 | Exposure             | BW<P10            | BPD36 (6)                                | 4             | 1                 | 3                    | 8         |
| Gortner, 2003 <sup>70</sup>   | Germany       | Ca-Co  | yes          | 148           | 1       | 34.0                 | Exposure             | BW<P10            | BPD28 (6)                                | 4             | 0                 | 3                    | 7         |
| Gray, 1997 <sup>71</sup>      | Australia     | Cohort | yes          | 189           | 1       | 27.3                 | Exposure             | PE                | BPD28 (49)                               | 4             | 2                 | 3                    | 9         |
| Greenough, 2005 <sup>72</sup> | UK            | Ca-Co  | yes          | 34            | 1       | 28.5                 | Outcome              | BW<P10            | BPD28 (50)                               | 4             | 2                 | 3                    | 9         |
| Grisaru-G, 2012 <sup>73</sup> | Israel        | Cohort | yes          | 9756          | Network | 28.5                 | Exposure             | BW<P3             | BPD36 (15)                               | 4             | 2                 | 3                    | 9         |
| Guimaraes, 2010 <sup>77</sup> | Portugal      | Cohort | yes          | 256           | 5       | 28.0                 | Outcome              | BW<P10            | BPD36 (18)                               | 4             | 1                 | 3                    | 8         |
| Guo, 2015 <sup>75</sup>       | Taiwan        | Cohort | no           | 75            | 1       | 27.6                 | Outcome              | Any HDP<br>BW<P10 | sBPD (63)                                | 4             | 1                 | 3                    | 8         |
| Gursoy, 2015 <sup>76</sup>    | Turkey        | Cohort | no           | 652           | 1       | 29.4                 | Outcome              | PE<br>BW<P10      | BPD28 (23)                               | 4             | 2                 | 3                    | 9         |
| Hadchouel, 2020 <sup>77</sup> | France        | Ca-Co  | no           | 19            | 3       | 26.7                 | Outcome              | BW<P10            | sBPD (58)                                | 3             | 1                 | 3                    | 7         |
| Hansen, 2010 <sup>78</sup>    | UK            | Cohort | yes          | 107           | 1       | 29.0                 | Outcome              | PE                | BPD36 (25)                               | 4             | 2                 | 3                    | 9         |
| Hartung, 2005 <sup>79</sup>   | Germany       | Ca-Co  | no           | 88            | 1       | 31.0                 | Exposure             | IUGR              | BPD36 (9)                                | 4             | 1                 | 3                    | 8         |
| Hentges, 2015 <sup>80</sup>   | Brazil        | Cohort | yes          | 88            | 1       | 30.1                 | Exposure             | PE                | BPD28 (26)                               | 4             | 2                 | 3                    | 9         |
| Hernandez, 2004 <sup>81</sup> | Mexico        | Ca-Co  | yes          | 44            | 1       | 31.1                 | Outcome              | Any HDP           | BPD28 (50)                               | 4             | 1                 | 3                    | 8         |

| First author, year             | Country                    | Design | Prospective? | Total infants | Centers | GA of cohort (weeks) | Independent variable | Exposures         | Outcomes (% of incidence in total group) | NOS Selection | NOS Comparability | NOS Outcome/Exposure | NOS Total |
|--------------------------------|----------------------------|--------|--------------|---------------|---------|----------------------|----------------------|-------------------|------------------------------------------|---------------|-------------------|----------------------|-----------|
| Hiett, 2001 <sup>82</sup>      | USA                        | Ca-Co  | no           | 116           | 2       | 27.1                 | Exposure             | PE                | BPD28 (60)                               | 4             | 2                 | 3                    | 9         |
| Hikino, 2012 <sup>83</sup>     | Japan                      | Cohort | yes          | 26            | 1       | 29.0                 | Outcome              | BW<P10            | BPD36 (50)                               | 4             | 1                 | 3                    | 8         |
| Huusko, 2015 <sup>84</sup>     | Finland, Canada en Hungary | Ca-Co  | yes          | 772           | 8       | 27.8                 | Outcome              | BW<P3             | BPD36 (28)                               | 4             | 2                 | 3                    | 9         |
| Imamura, 2017 <sup>85</sup>    | Japan                      | Cohort | no           | 169           | 1       | 26.0                 | Outcome              | BW<P10            | sBPD (40)                                | 4             | 2                 | 3                    | 9         |
| Iwatani, 2013 <sup>86</sup>    | Japan                      | Cohort | no           | 51            | 1       | 25.7                 | Outcome              | Any HDP           | BPD36 (51)                               | 4             | 2                 | 3                    | 9         |
| Jakuskiene, 2011 <sup>87</sup> | Lithuania                  | Cohort | yes          | 238           | 1       | 27.4                 | Outcome              | BW<P10            | BPD36 (6)                                | 4             | 1                 | 3                    | 8         |
| Jensen, 2019 <sup>88</sup>     | USA                        | Cohort | no           | 6708          | Network | 28.6                 | Exposure             | BW<P10            | BPD36 (29)<br>BPD/Death (35)             | 4             | 1                 | 3                    | 8         |
| Jeon, 2020 <sup>89</sup>       | Korea                      | Cohort | yes          | 521           | 1       | 27.4                 | Outcome              | Any HDP           | BPD36 (48)                               | 4             | 1                 | 3                    | 8         |
| Jo, 2015 <sup>90</sup>         | Korea                      | Cohort | no           | 2386          | 55      | 29.0                 | Outcome              | Any HDP           | BPD36 (32)                               | 4             | 2                 | 3                    | 9         |
| Kalra, 2014 <sup>91</sup>      | USA                        | Ca-Co  | yes          | 60            | 2       | 27.0                 | Outcome              | BW<P10            | BPD36 (55)                               | 4             | 1                 | 3                    | 8         |
| Kanaan, 2018 <sup>92</sup>     | USA                        | Cohort | no           | 1340          | 1       | 27.8                 | Outcome              | Any HDP<br>BW<P10 | BPD-PH (12)                              | 4             | 2                 | 3                    | 9         |
| Kandasamy, 2015 <sup>93</sup>  | USA                        | Cohort | yes          | 152           | 1       | 25.2                 | Outcome              | BW<P10            | BPD/Death (23)                           | 4             | 1                 | 3                    | 8         |
| Karagianni, 2011 <sup>94</sup> | Greece                     | Cohort | yes          | 219           | 1       | 29.1                 | Outcome              | BW<P10            | BPD36 (28)                               | 4             | 1                 | 3                    | 8         |
| Karagianni, 2013 <sup>95</sup> | Greece                     | Ca-Co  | yes          | 61            | 1       | 32.0                 | Outcome              | BW<P10            | BPD36 (46)                               | 4             | 1                 | 3                    | 8         |
| Khan, 2006 <sup>96</sup>       | USA                        | Cohort | no           | 306           | 2       | 26.7                 | Outcome              | PE                | BPD36 (45)                               | 4             | 2                 | 3                    | 9         |
| Khan, 2020 <sup>97</sup>       | USA                        | Cohort | yes          | 68            | 1       | 27.0                 | Outcome              | PE<br>BW<P10      | BPD36 (65)                               | 4             | 2                 | 3                    | 9         |
| Khemani, 2007 <sup>98</sup>    | USA                        | Cohort | no           | 42            | 3       | 26.0                 | Outcome              | BW<P3             | BPD-PH (43)                              | 3             | 1                 | 3                    | 7         |
| Kim, 2014 <sup>99</sup>        | Korea                      | Ca-Co  | no           | 56            | 1       | 26.1                 | Outcome              | PE<br>BW<P3       | sBPD (66)<br>BPD-PH (27)                 | 4             | 1                 | 3                    | 8         |

| First author, year                 | Country   | Design | Prospective? | Total infants | Centers | GA of cohort (weeks) | Independent variable | Exposures         | Outcomes (% of incidence in total group)   | NOS Selection | NOS Comparability | NOS Outcome/Exposure | NOS Total |
|------------------------------------|-----------|--------|--------------|---------------|---------|----------------------|----------------------|-------------------|--------------------------------------------|---------------|-------------------|----------------------|-----------|
| Kim, 1996 <sup>100</sup>           | USA       | Ca-Co  | no           | 117           | 1       | 28                   | Exposure             | Any HDP           | BPD28 (48)<br>BPD36 (15)                   | 3             | 1                 | 3                    | 7         |
| Kim, 2018 <sup>101</sup>           | Korea     | cohort | no           | 199           | 1       | 28.9                 | Exposure             | PE                | BPD36 (31)                                 | 4             | 2                 | 3                    | 9         |
| Kim, 2020 <sup>102</sup>           | Korea     | Cohort | no           | 117           | 1       | 28.8                 | Outcome              | BW<P10            | BPD28 (91)<br>sBPD (18)                    | 3             | 1                 | 3                    | 7         |
| Klinger, 2013 <sup>103</sup>       | Israel    | Cohort | yes          | 12139         | 28      | 29.0                 | Outcome              | Any HDP<br>BW<P10 | BPD36 (14)                                 | 4             | 2                 | 3                    | 9         |
| Köksal, 2012 <sup>104</sup>        | Turkey    | Cohort | yes          | 102           | 1       | 28.6                 | Outcome              | PE                | BPD28 (30)                                 | 4             | 1                 | 3                    | 8         |
| Korhonen, 2004 <sup>105</sup>      | Finland   | Cohort | yes          | 68            | 1       | 27.5                 | Outcome              | BW<P3             | BPD36 (50)                                 | 4             | 1                 | 2                    | 7         |
| Koroglu, 2013 <sup>106</sup>       | Turkey    | Ca-Co  | yes          | 41            | 1       | 28.9                 | Outcome              | PE                | BPD28 (43)                                 | 3             | 2                 | 3                    | 8         |
| Kunjunju, 2017 <sup>107</sup>      | Australia | Cohort | no           | 56            | 1       | 26.0                 | Outcome              | PE                | BPD-PH (39)                                | 3             | 1                 | 3                    | 7         |
| Lagatta, 2018 <sup>108</sup>       | USA       | Cohort | No           | 1677          | 23      | 25.0                 | Outcome              | Any HDP<br>BW<P10 | BPD-PH (22)                                | 3             | 2                 | 3                    | 8         |
| Lal, 2003 <sup>109</sup>           | UK        | Cohort | yes          | 2838          | Network | 29.9                 | Outcome              | BW<P10            | BPD28 (23)<br>BPD36 (14)<br>BPD/Death (23) | 4             | 1                 | 3                    | 8         |
| Lapcharoensap, 2015 <sup>110</sup> | USA       | Cohort | no           | 15052         | 132     | 27.0                 | Outcome              | Any HDP<br>IUGR   | BPD/Death (47)                             | 4             | 2                 | 3                    | 9         |
| Lardon-Fdz, 2017 <sup>111</sup>    | Spain     | Cohort | no           | 129           | 1       | 28.7                 | Outcome              | PE<br>BW<P3       | BPD28 (47)<br>BPD36 (19)<br>sBPD (7)       | 3             | 1                 | 3                    | 7         |
| Lehtinen, 2017 <sup>112</sup>      | Finland   | Cohort | yes          | 53            | 1       | 29.0                 | Outcome              | BW<P3             | BPD36 (40)                                 | 4             | 2                 | 3                    | 9         |
| Leroy, 2018 <sup>113</sup>         | Canada    | Cohort | yes          | 62            | 1       | 27.0                 | Outcome              | BW<P10            | BPD36 (52)                                 | 4             | 1                 | 3                    | 8         |
| Li, 2013 <sup>114</sup>            | China     | Cohort | yes          | 160           | 1       | 30.9                 | Outcome              | PE<br>BW<P10      | BPD/Death (36)                             | 4             | 2                 | 3                    | 9         |
| Lin, 2005 <sup>115</sup>           | Taiwan    | Ca-Co  | yes          | 224           | 1       | 26.7                 | Outcome              | BW<P3             | BPD36 (50)                                 | 4             | 1                 | 3                    | 8         |

| First author, year               | Country          | Design | Prospective? | Total infants | Centers | GA of cohort (weeks) | Independent variable | Exposures    | Outcomes (% of incidence in total group)   | NOS Selection | NOS Comparability | NOS Outcome/Exposure | NOS Total |
|----------------------------------|------------------|--------|--------------|---------------|---------|----------------------|----------------------|--------------|--------------------------------------------|---------------|-------------------|----------------------|-----------|
| Lodha, 2014 <sup>116</sup>       | Canada           | Cohort | yes          | 586           | 1       | 28.5                 | Outcome              | BW<P10       | BPD36 (25)                                 | 4             | 1                 | 2                    | 7         |
| Löfqvist, 2012 <sup>117</sup>    | Sweden           | Cohort | yes          | 108           | 2       | 27.2                 | Outcome              | PE<br>BW<P3  | BPD36 (54)                                 | 4             | 2                 | 3                    | 9         |
| Lohmann, 2014 <sup>118</sup>     | USA              | Cohort | yes          | 22            | 1       | 27.2                 | Outcome              | Any HDP      | BPD36 (45)                                 | 4             | 1                 | 3                    | 8         |
| MacKenzie, 2020 <sup>119</sup>   | Canada           | Cohort | No           | 87            | 1       | 25.9                 | Outcome              | Any HDP      | BPD-PH (28)                                | 3             | 1                 | 3                    | 7         |
| Madoglio, 2016 <sup>120</sup>    | Brazil           | Cohort | yes          | 73            | 1       | 28.7                 | Exposure             | PE           | BPD28 (36)<br>BPD36 (18)<br>BPD/Death (46) | 3             | 1                 | 3                    | 7         |
| Mahlman, 2017 <sup>121</sup>     | Finland          | Ca-Co  | yes          | 174           | 5       | 27.4                 | Outcome              | PE<br>BW<P3  | BPD 36 (34)                                | 4             | 1                 | 3                    | 8         |
| Malavolti, 2018 <sup>122</sup>   | Switzerland      | Cohort | no           | 610           | 1       | 27.9                 | Outcome              | BW<P10       | BPD28 (59)                                 | 4             | 2                 | 3                    | 9         |
| Mao, 2018 <sup>124</sup>         | China            | Ca-Co  | yes          | 39            | 1       | 29.6                 | Outcome              | PE<br>BW<P10 | BPD36 (49)                                 | 4             | 1                 | 3                    | 8         |
| Marshall, 1999 <sup>124</sup>    | USA              | Cohort | yes          | 865           | 13      | 28.9                 | Outcome              | PE           | BPD36 (26)                                 | 3             | 2                 | 3                    | 8         |
| Matic, 2017 <sup>125</sup>       | Australia and UK | Cohort | no           | 2549          | 10      | 26.7                 | Exposure             | Any HDP      | BPD36 (30)                                 | 4             | 2                 | 3                    | 9         |
| May, 2009 <sup>126</sup>         | UK               | Cohort | yes          | 80            | 1       | 28.0                 | Outcome              | BW<P10       | BPD28 (58)<br>BPD36 (39)<br>sBPD (16)      | 4             | 1                 | 3                    | 8         |
| McGowan, 2009 <sup>127</sup>     | USA              | Ca-Co  | no           | 98            | 1       | 26.3                 | Outcome              | PE<br>BW<P10 | BPD36 (50)                                 | 4             | 2                 | 3                    | 9         |
| Melamed, 2016 <sup>128</sup>     | Canada           | Cohort | no           | 6567          | Network | 29.8                 | Exposure             | BW<P10       | BPD36 (12)                                 | 4             | 2                 | 3                    | 9         |
| Mello, 2017 <sup>129</sup>       | Brasil           | Cohort | yes          | 112           | 1       | 29.5                 | Outcome              | BW<P10       | BPD28 (44)                                 | 4             | 2                 | 2                    | 8         |
| Méndez-Abad, 2020 <sup>130</sup> | Spain            | Cohort | yes          | 101           | 1       | 29.0                 | Outcome              | BW<P10       | BPD36 (15)                                 | 4             | 1                 | 3                    | 8         |
| Mohamed, 2015 <sup>131</sup>     | Canada           | Cohort | yes          | 99            | 1       | 26.4                 | Outcome              | PE<br>BW<P10 | BPD36 (66)                                 | 4             | 1                 | 3                    | 8         |

| First author, year              | Country   | Design | Prospective? | Total infants | Centers | GA of cohort (weeks) | Independent variable | Exposures         | Outcomes (% of incidence in total group) | NOS Selection | NOS Comparability | NOS Outcome/Exposure | NOS Total |
|---------------------------------|-----------|--------|--------------|---------------|---------|----------------------|----------------------|-------------------|------------------------------------------|---------------|-------------------|----------------------|-----------|
| Monier, 2017 <sup>132</sup>     | France    | Cohort | yes          | 5919          | Network | 29.0                 | Exposure             | IUGR              | BPD36 (48)<br>sBPD (7)                   | 4             | 2                 | 3                    | 9         |
| Morrow, 2017 <sup>133</sup>     | USA       | Cohort | yes          | 587           | 5       | 27.0                 | Outcome              | PE<br>BW<P10      | BPD36 (41)                               | 4             | 2                 | 3                    | 9         |
| Morsing, 2012 <sup>134</sup>    | Sweden    | Ca-Co  | yes          | 62            | 1       | 27.0                 | Exposure             | IUGR              | sBPD (50)                                | 3             | 1                 | 3                    | 7         |
| Mourani, 2015 <sup>135</sup>    | USA       | Cohort | yes          | 277           | 2       | 27.0                 | Outcome              | PE<br>BW<P10      | BPD-PH (14)                              | 4             | 1                 | 3                    | 8         |
| Naeem, 2020 <sup>136</sup>      | USA       | Cohort | yes          | 26            | N       | 26.1                 | Outcome              | Any HDP           | BPD36 (72)<br>BPD-PH (17)                | 4             | 1                 | 3                    | 8         |
| Nascimento, 2020 <sup>137</sup> | UK        | Cohort | yes          | 40            | 1       | 28.0                 | Outcome              | BW<P10            | BPD36 (53)                               | 4             | 1                 | 3                    | 8         |
| Natarajan, 2012 <sup>138</sup>  | USA       | Cohort | yes          | 1159          | Network | 25.7                 | Outcome              | BW<P10            | BPD36 (13)                               | 4             | 2                 | 3                    | 9         |
| Naveda, 2016 <sup>139</sup>     | Venezuela | Ca-Co  | yes          | 144           | 1       | 33.0                 | Outcome              | Any HDP           | BPD28 (25)                               | 3             | 2                 | 3                    | 8         |
| Newman, 2011 <sup>140</sup>     | USA       | Cohort | no           | 156           | 1       | 28.6                 | Outcome              | Any HDP<br>BW<P10 | BPD28 (51)<br>sBPD (31)                  | 4             | 2                 | 3                    | 9         |
| Nobile, 2017 <sup>141</sup>     | Italy     | Cohort | no           | 515           | 1       | 28.0                 | Exposure             | IUGR<br>BW<P10    | BPD36 (22)<br>BPD/Death (38)             | 4             | 2                 | 3                    | 9         |
| Novitsky, 2015 <sup>142</sup>   | USA       | Cohort | no           | 906           | 1       | 28.2                 | Outcome              | PE                | BPD36 (20)                               | 3             | 2                 | 3                    | 8         |
| O'Shea, 2012 <sup>143</sup>     | Australia | Cohort | no           | 751           | Network | 26.6                 | Outcome              | PE<br>BW<P3       | BPD36 (44)                               | 4             | 2                 | 3                    | 9         |
| Oh, 2005 <sup>144</sup>         | USA       | Cohort | no           | 1382          | Network | 26.0                 | Outcome              | Any HDP           | BPD/Death (58)                           | 4             | 2                 | 3                    | 9         |
| Ozkan, 2012 <sup>145</sup>      | Turkey    | Cohort | yes          | 332           | 1       | 29.2                 | Exposure             | PE                | BPD28 (26)<br>BPD36 (14)<br>sBPD (8)     | 4             | 2                 | 3                    | 9         |
| Palta, 1996 <sup>146</sup>      | USA       | Cohort | no           | 632           | 7       | 28.7                 | Exposure             | PE-HELLP          | BPD28 (24)                               | 3             | 1                 | 3                    | 7         |
| Park, 2012 <sup>147</sup>       | Korea     | Cohort | no           | 191           | 1       | 29.4                 | Exposure             | Any HDP           | BPD28 (36)<br>BPD36 (29)                 | 4             | 1                 | 3                    | 8         |

| First author, year               | Country         | Design | Prospective? | Total infants | Centers | GA of cohort (weeks) | Independent variable | Exposures         | Outcomes (% of incidence in total group) | NOS Selection | NOS Comparability | NOS Outcome/Exposure | NOS Total |
|----------------------------------|-----------------|--------|--------------|---------------|---------|----------------------|----------------------|-------------------|------------------------------------------|---------------|-------------------|----------------------|-----------|
| Patel, 2017 <sup>148</sup>       | USA             | Cohort | yes          | 254           | 1       | 27.9                 | Outcome              | BW<P10            | BPD36 (30)                               | 4             | 2                 | 3                    | 9         |
| Qi, 2013 <sup>149</sup>          | China           | Cohort | yes          | 60            | 1       | 29.5                 | Outcome              | Any HDP<br>BW<P10 | BPD36 (42)                               | 4             | 1                 | 3                    | 8         |
| Qiu, 2012 <sup>150</sup>         | Canada          | Cohort | no           | 11909         | Network | 28.8                 | Exposure             | BW<P10            | BPD36 (21)<br>BPD/Death (30)             | 4             | 2                 | 3                    | 9         |
| Ra, 2013 <sup>151</sup>          | Korea           | Cohort | no           | 85            | 1       | 28.0                 | Outcome              | Any HDP           | BPD-PH (21)                              | 3             | 1                 | 3                    | 7         |
| Rakza, 2007 <sup>152</sup>       | France          | Cohort | yes          | 48            | 1       | 29.1                 | Exposure             | IUGR              | BPD36 (21)<br>BPD/Death (29)             | 4             | 1                 | 3                    | 8         |
| Ranke, 2007 <sup>153</sup>       | Germany         | Cohort | yes          | 97            | 1       | 29.0                 | Exposure             | BW<P10            | BPD36 (39)                               | 4             | 1                 | 2                    | 7         |
| Razak 2020 <sup>154</sup>        | Canada          | Ca-Co  | no           | 237           | 1       | 29.2                 | Exposure             | Any HDP           | BPD36 (20)                               | 4             | 2                 | 3                    | 9         |
| Redline, 2002 <sup>155</sup>     | USA             | cohort | no           | 371           | 1       | 27.6                 | Outcome              | PE                | BPD36 (30)                               | 4             | 1                 | 3                    | 8         |
| Regev, 2015 <sup>156</sup>       | Israel          | cohort | yes          | 2139          | 28      | 29.7                 | Exposure             | Any HDP           | BPD36 (12)                               | 4             | 1                 | 3                    | 8         |
| Regev, 2003 <sup>157</sup>       | Israel          | Cohort | yes          | 2764          | Network | 27.9                 | Exposure             | BW<P3             | BPD36 (22)<br>BPD/Death (43)             | 4             | 2                 | 3                    | 9         |
| Reiss, 2003 <sup>158</sup>       | Germany         | Cohort | yes          | 1365          | 1       | 28.8                 | Exposure             | BW<P10            | BPD36 (14)                               | 4             | 2                 | 3                    | 9         |
| Rijken, 2007 <sup>159</sup>      | The Netherlands | Cohort | yes          | 158           | 1       | 28.8                 | Exposure             | BW<P10            | BPD36 (22)                               | 4             | 2                 | 3                    | 9         |
| Rocha, 2018 <sup>160</sup>       | Portugal        | Cohort | yes          | 494           | 11      | 27.3                 | Exposure             | Any HDP           | BPD36 (24)                               | 4             | 2                 | 3                    | 9         |
| Rocha, 2010 <sup>161</sup>       | Portugal        | Cohort | yes          | 205           | 1       | 29.0                 | Outcome              | BW<P10            | BPD36 (22)                               | 4             | 1                 | 3                    | 8         |
| Rojas, 2012 <sup>162</sup>       | Colombia        | Ca-Co  | no           | 212           | 8       | 29.2                 | Outcome              | BW<P10            | BPD36 (30)                               | 4             | 2                 | 3                    | 9         |
| Ruiz-Pelaez, 2014 <sup>163</sup> | Colombia        | Cohort | yes          | 416           | 12      | 31.9                 | Outcome              | BW<P10            | BPD28 (54)<br>BPD36 (17)                 | 3             | 1                 | 3                    | 7         |
| Sasi, 2015 <sup>164</sup>        | Australia       | Cohort | no           | 459           | 1       | 28.7                 | Exposure             | IUGR              | BPD36 (27)<br>BPD/Death (30)             | 4             | 1                 | 3                    | 8         |
| Schena, 2015 <sup>165</sup>      | Italy           | Cohort | no           | 242           | 1       | 26.3                 | Outcome              | BW<P10            | BPD/Death (43)                           | 4             | 1                 | 3                    | 8         |

| First author, year              | Country     | Design | Prospective? | Total infants | Centers | GA of cohort (weeks) | Independent variable | Exposures          | Outcomes (% of incidence in total group)   | NOS Selection | NOS Comparability | NOS Outcome/Exposure | NOS Total |
|---------------------------------|-------------|--------|--------------|---------------|---------|----------------------|----------------------|--------------------|--------------------------------------------|---------------|-------------------|----------------------|-----------|
| Schiff, 1993 <sup>166</sup>     | USA         | Ca-Co  | yes          | 138           | 1       | 33.8                 | Exposure             | PE-HELLP           | BPD28 (1)                                  | 4             | 2                 | 3                    | 9         |
| Schlapbach, 2010 <sup>167</sup> | Switzerland | Ca-Co  | yes          | 99            | 1       | 29.3                 | Exposure             | PE                 | BPD36 (14)                                 | 4             | 1                 | 3                    | 8         |
| Seo, 2020 <sup>168</sup>        | Korea       | Cohort | no           | 81            | 1       | 26.4                 | Outcome              | Any HDP<br>BW<P10  | BPD-PH (30)                                | 4             | 1                 | 2                    | 7         |
| Serenius, 2004 <sup>169</sup>   | Sweden      | Cohort | no           | 140           | 2       | 24.2                 | Outcome              | BW<P3              | BPD36 (36)                                 | 4             | 2                 | 3                    | 9         |
| Sharma, 2004 <sup>170</sup>     | USA         | Cohort | no           | 2364          | 1       | 31.2                 | Exposure             | BW<P10             | BPD28 (?)<br>BPD36 (?)                     | 4             | 1                 | 3                    | 8         |
| Sheth, 2020 <sup>171</sup>      | USA         | Ca-Co  | no           | 220           | 1       | 25.9                 | Outcome              | PE<br>BW<P10       | BPD-PH (27)                                | 4             | 2                 | 3                    | 9         |
| Shima, 2013 <sup>172</sup>      | Japan       | Cohort | no           | 306           | 1       | 29.0                 | Outcome              | Any HDP<br>BW<P10  | BPD28 (42)<br>BPD36 (17)                   | 3             | 1                 | 3                    | 7         |
| Shin, 2020 <sup>173</sup>       | Korea       | Cohort | yes          | 1827          | Network | 27.4                 | Exposure             | Any HDP            | BPD36 (42)                                 | 4             | 2                 | 3                    | 9         |
| Silveira, 2007 <sup>174</sup>   | Brazil      | Cohort | yes          | 86            | 1       | 30.9                 | Exposure             | PE                 | BPD36 (14)                                 | 3             | 1                 | 3                    | 7         |
| Soliman, 2017 <sup>175</sup>    | Canada      | Cohort | yes          | 319           | 1       | 28.8                 | Exposure             | PE-HELLP<br>BW<P10 | BPD28 (39)<br>BPD36 (25)                   | 4             | 1                 | 3                    | 8         |
| Somaschini, 2012 <sup>176</sup> | Italy       | Cohort | no           | 366           | 12      | 28.5                 | Outcome              | Any HDP<br>BW<P10  | BPD 28 (39)<br>BPD 36 (21)<br>sBPD (10)    | 3             | 1                 | 3                    | 7         |
| Soudee, 2014 <sup>177</sup>     | France      | Ca-Co  | no           | 293           | 1       | 28.5                 | Exposure             | BW<P3              | BPD28 (57)<br>BPD36 (24)<br>BPD/Death (37) | 4             | 2                 | 3                    | 9         |
| Spiegler, 2013 <sup>178</sup>   | Germany     | Cohort | no           | 1577          | 28      | 29.2                 | Exposure             | PE                 | BPD36 (12)                                 | 3             | 1                 | 3                    | 7         |
| Starr, 2020 <sup>179</sup>      | USA         | Cohort | no           | 546           | 24      | 27.9                 | Outcome              | Any HDP<br>BW<P10  | BPD/Death (45)                             | 4             | 2                 | 3                    | 9         |
| Streubel, 2008 <sup>180</sup>   | USA         | Cohort | yes          | 133           | 1       | 26.6                 | Outcome              | BW<P10             | BPD36 (29)                                 | 4             | 1                 | 3                    | 8         |
| Sun, 2019 <sup>181</sup>        | China       | Cohort | no           | 296           | 1       | 30.0                 | Outcome              | Any HDP<br>BW<P10  | BPD28 (49)                                 | 4             | 1                 | 3                    | 8         |



| First author, year                  | Country         | Design | Prospective? | Total infants | Centers | GA of cohort (weeks) | Independent variable | Exposures         | Outcomes (% of incidence in total group) | NOS Selection | NOS Comparability | NOS Outcome/Exposure | NOS Total |
|-------------------------------------|-----------------|--------|--------------|---------------|---------|----------------------|----------------------|-------------------|------------------------------------------|---------------|-------------------|----------------------|-----------|
| Tammela, 1992 <sup>182</sup>        | Finland         | Cohort | yes          | 46            | 1       | 31.7                 | Outcome              | BW<P3             | BPD36 (50)                               | 4             | 1                 | 3                    | 8         |
| Teberg, 1991 <sup>183</sup>         | USA             | Cohort | yes          | 236           | 1       | 30.4                 | Outcome              | Any HDP<br>BW<P10 | BPD28 (25)                               | 4             | 2                 | 3                    | 9         |
| Todd, 1997 <sup>184</sup>           | Australia       | Ca-Co  | yes          | 296           | 1       | 28.0                 | Outcome              | Any HDP           | BPD36 (50)                               | 3             | 1                 | 3                    | 7         |
| Tokumasu, 2016 <sup>185</sup>       | Japan           | Cohort | no           | 4518          | 79      | 26.1                 | Exposure             | PE-HELLP          | BPD36 (25)                               | 4             | 1                 | 3                    | 8         |
| Torchin, 2016 <sup>186</sup>        | France          | Cohort | yes          | 2638          | ?       | 29.7                 | Exposure             | Any HDP<br>IUGR   | BPD36 (10)                               | 4             | 1                 | 3                    | 8         |
| Torrance, 2007 <sup>187</sup>       | Netherlands     | Cohort | no           | 187           | 1       | 30.4                 | Exposure             | Any HDP           | BPD28 (23)                               | 4             | 2                 | 3                    | 9         |
| Tsai, 2015 <sup>188</sup>           | Taiwan          | Cohort | yes          | 1680          | 21      | 28.3                 | Exposure             | BW<P10            | BPD36 (32)<br>BPD/Death (47)             | 4             | 2                 | 3                    | 9         |
| Turunen, 2011 <sup>189</sup>        | Finland         | Ca-Co  | yes          | 46            | 1       | 26.9                 | Exposure             | PE                | BPD36 (70)                               | 4             | 2                 | 3                    | 9         |
| Uberos, 2020 <sup>190</sup>         | Spain           | Cohort | no           | 389           | 1       | 29.0                 | Outcome              | Any HDP<br>BW<P10 | BPD36 (41)                               | 4             | 2                 | 3                    | 9         |
| Van Mastright , 2018 <sup>191</sup> | The Netherlands | Cohort | yes          | 111           | 1       | 28.0                 | Outcome              | PE                | BPD/Death (40)                           | 4             | 2                 | 3                    | 9         |
| Vayaltrikkovil, 2019 <sup>192</sup> | Canada          | Cohort | Yes          | 126           | 1       | 26.2                 | Outcome              | Any HDP<br>BW<P10 | BPD-PH (19)                              | 3             | 1                 | 3                    | 7         |
| Viscardi, 2004 <sup>193</sup>       | USA             | Cohort | yes          | 262           | 2       | 28.0                 | Outcome              | PE<br>BW<P10      | BPD28 (58)                               | 4             | 2                 | 3                    | 9         |
| Vrlenich, 1995 <sup>194</sup>       | USA             | Cohort | yes          | 406           | 10      | 30.3                 | Outcome              | BW<P3             | BPD36 (23)                               | 4             | 1                 | 2                    | 7         |
| Wadhawan, 2007 <sup>195</sup>       | USA             | Cohort | no           | 9461          | 19      | 26.0                 | Exposure             | BW<P10            | BPD36 (42)<br>BPD/Death (55)             | 4             | 1                 | 3                    | 8         |
| Wang, 2014 <sup>196</sup>           | China           | Cohort | yes          | 73            | 1       | 30.5                 | Outcome              | Any HDP           | BPD28 (33)                               | 3             | 1                 | 3                    | 7         |
| Wang, 2018 <sup>197</sup>           | China           | Cohort | no           | 191           | 1       | 28.2                 | Outcome              | Any HDP<br>BW<P3  | BPD-PH (19)                              | 3             | 1                 | 3                    | 7         |
| Wang, 2013 <sup>198</sup>           | USA             | Ca-Co  | no           | 1649          | Network | 27.0                 | Outcome              | IUGR              | BPD36 (52)                               | 4             | 2                 | 3                    | 9         |

| First author, year                | Country         | Design | Prospective? | Total infants | Centers | GA of cohort (weeks) | Independent variable | Exposures         | Outcomes (% of incidence in total group)   | NOS Selection | NOS Comparability | NOS Outcome/Exposure | NOS Total |
|-----------------------------------|-----------------|--------|--------------|---------------|---------|----------------------|----------------------|-------------------|--------------------------------------------|---------------|-------------------|----------------------|-----------|
| Wang, 2010 <sup>199</sup>         | Taiwan          | Cohort | yes          | 72            | 2       | 28.3                 | Outcome              | BW<P10            | BPD28 (78)<br>BPD36 (52)<br>sBPD (36)      | 4             | 2                 | 3                    | 9         |
| Weismann, 2017 <sup>200</sup>     | USA             | Cohort | yes          | 159           | 1       | 25.6                 | Outcome              | Any HDP<br>BW<P10 | BPD-PH (28)                                | 4             | 2                 | 3                    | 9         |
| Wemhöner, 2011 <sup>201</sup>     | Austria         | Cohort | no           | 95            | 1       | 27.7                 | Outcome              | BW<P10            | BPD36                                      | 4             | 1                 | 3                    | 8         |
| Westby Wold, 2009 <sup>202</sup>  | Norway          | Cohort | no           | 365           | 15      | 26.0                 | Exposure             | BW<P5             | BPD36 (40)<br>BPD/Death (60)               | 4             | 1                 | 3                    | 8         |
| Wilmink 2019 <sup>203</sup>       | The Netherlands | Cohort | no           | 273           | 1       | 29.3                 | Exposure             | PE                | BPD28 (24)<br>BPD36 (11)<br>BPD/Death (19) | 4             | 2                 | 3                    | 9         |
| Wirbelauer, 2010 <sup>204</sup>   | Germany         | Cohort | yes          | 49            | 1       | 27.7                 | Exposure             | BW<P10            | BPD28 (29)                                 | 4             | 1                 | 3                    | 8         |
| Withagen, 2001 <sup>205</sup>     | Netherlands     | Ca-Co  | no           | 666           | 1       | 30.7                 | Exposure             | PE-HELLP          | BPD28 (13)                                 | 4             | 2                 | 3                    | 9         |
| Wocadlo, 1994 <sup>206</sup>      | Australia       | Cohort | yes          | 36            | 1       | 27.6                 | Exposure             | BW<P10            | BPD28 (50)                                 | 4             | 1                 | 2                    | 7         |
| Won Choi, 2006 <sup>207</sup>     | Korea           | Cohort | yes          | 75            | 1       | 28.5                 | Outcome              | Any HDP           | BPD36 (35)                                 | 3             | 1                 | 3                    | 7         |
| Xu, 2016 <sup>208</sup>           | China           | Cohort | no           | 42            | 1       | 28.0                 | Outcome              | BW<P10            | BPD36 (76)<br>sBPD (36)                    | 3             | 1                 | 3                    | 7         |
| Xydis, 2013 <sup>209</sup>        | Greece          | Cohort | yes          | 205           | 1       | 32.9                 | Exposure             | BW<P3             | BPD36 (59)                                 | 4             | 2                 | 3                    | 9         |
| Yallapragada, 2016 <sup>210</sup> | USA             | Ca-Co  | yes          | 14            | 1       | 26.2                 | Outcome              | PE<br>BW<P10      | BPD-PH (50)                                | 4             | 1                 | 3                    | 8         |
| Yen, 2013 <sup>211</sup>          | Taiwan          | Cohort | no           | 5753          | 21      | 30.0                 | Exposure             | PE                | BPD36 (35)                                 | 3             | 1                 | 3                    | 7         |
| Yilmaz, 2017 <sup>212</sup>       | Turkey          | Cohort | yes          | 40            | 1       | 30.2                 | Outcome              | PE<br>BW<P10      | BPD28 (35)                                 | 4             | 1                 | 3                    | 8         |
| Yoon, 1999 <sup>213</sup>         | Korea           | Cohort | yes          | 203           | 1       | 31.0                 | Outcome              | BW<P10            | BPD28 (17)                                 | 4             | 2                 | 3                    | 9         |
| Yu, 2011 <sup>214</sup>           | Korea           | Cohort | no           | 415           | 1       | 26.2                 | Exposure             | BW<P3             | BPD36 (37)                                 | 4             | 2                 | 3                    | 9         |
| Zanardo, 2002 <sup>215</sup>      | Italy           | Ca-Co  | no           | 100           | 1       | 27.7                 | Outcome              | BW<P10            | BPD28 (50)                                 | 3             | 1                 | 3                    | 7         |

| First author, year         | Country | Design | Prospective? | Total infants | Centers | GA of cohort (weeks) | Independent variable | Exposures         | Outcomes (% of incidence in total group) | NOS Selection | NOS Comparability | NOS Outcome/Exposure | NOS Total |
|----------------------------|---------|--------|--------------|---------------|---------|----------------------|----------------------|-------------------|------------------------------------------|---------------|-------------------|----------------------|-----------|
| Zhang, 2011 <sup>216</sup> | China   | cohort | no           | 116           | 1       | 30.2                 | Outcome              | Any HDP<br>BW<P10 | BPD28 (48)                               | 3             | 1                 | 3                    | 7         |

BPD28: BPD defined as oxygen requirement on postnatal day 28; BPD36: defined as oxygen requirement at the postmenstrual age of 36 weeks; BPD-PH: BPD-associated pulmonary hypertension; BW: birth weight; HDP: hypertensive disorders of pregnancy; IUGR: intrauterine growth restriction (defined on the basis of fetal growth assessment); NOS: Newcastle Ottawa Scale; P3: 3<sup>rd</sup> percentile; P5: 5<sup>th</sup> percentile; P10: 10<sup>th</sup> percentile; PE: preeclampsia; sBPD: severe BPD ( $\geq$  30% oxygen or mechanical ventilation at the postmenstrual age of 36 weeks); SGA: small for gestational age. The number in parentheses after the outcome indicates the outcome rate in the study.

**Supplementary Table 2. Meta-regression analysis (continuous covariates)**

| Association        | Covariate                          | Covariate unit | K  | Coefficient | 95% CI      |             | P      | R <sup>2</sup> analog |
|--------------------|------------------------------------|----------------|----|-------------|-------------|-------------|--------|-----------------------|
|                    |                                    |                |    |             | Lower limit | Upper limit |        |                       |
| HDP and BPD36      | MD in GA (exposed minus unexposed) | week           | 24 | -0.500      | -0.651      | -0.349      | <0.001 | 0.95                  |
|                    | GA total cohort (weeks)            | week           | 55 | -0.077      | -0.197      | 0.043       | 0.112  | 0.29                  |
|                    | Male sex (logOR)                   | logOR          | 20 | 0.190       | -0.670      | 1.050       | 0.665  | 0.00                  |
|                    | ACS (logOR)                        | logOR          | 17 | -0.148      | -0.578      | 0.282       | 0.501  | 0.00                  |
|                    | RDS (logOR)                        | logOR          | 12 | 0.266       | -0.185      | 0.716       | 0.248  | 0.00                  |
|                    | Median year of cohort              | year           | 60 | 0.008       | -0.018      | 0.035       | 0.426  | 0.00                  |
| SGA/IUGR and BPD36 | MD in GA (exposed minus unexposed) | week           | 35 | -0.311      | -0.571      | -0.051      | 0.002  | 0.08                  |
|                    | GA total cohort                    | week           | 91 | -0.039      | -0.133      | 0.056       | 0.295  | 0.00                  |
|                    | Male sex (logOR)                   | logOR          | 21 | -0.222      | -1.374      | 0.930       | 0.705  | 0.02                  |
|                    | ACS (logOR)                        | logOR          | 18 | -0.371      | -0.742      | 0.000       | 0.050  | 0.08                  |
|                    | RDS (logOR)                        | logOR          | 16 | 0.354       | -0.288      | 0.997       | 0.280  | 0.00                  |
|                    | Median year of cohort              | year           | 89 | 0.021       | -0.001      | 0.042       | 0.056  | 0.01                  |

Random effects (method of moments), univariate meta-regression. Coefficient indicates the change in the log of the OR of the association between BPD36 and the corresponding exposure for a unit change in the predictor covariate. R<sup>2</sup> analog: total between-study variance explained by the moderator. ACS: antenatal corticosteroids; BPD36: bronchopulmonary dysplasia defined as oxygen requirement at the postmenstrual age of 36 weeks; BW: birth weight; CI: confidence interval; GA: gestational age; HDP: hypertensive disorders of pregnancy; IUGR: intrauterine growth restriction (defined on the basis of fetal growth assessment); K: number of studies; OR: odds ratio; SGA: small for gestational age.

**Supplementary table 3. Meta-analyses on the association between SGA/IUGR and HDP**

| Meta-analysis                            | Subgroup                | K         | OR          | 95% CI      |             | P                | Heterogeneity      |                  |
|------------------------------------------|-------------------------|-----------|-------------|-------------|-------------|------------------|--------------------|------------------|
|                                          |                         |           |             | Lower limit | Upper limit |                  | I <sup>2</sup> (%) | P                |
| Exposure:<br>SGA/IUGR<br>Outcome:<br>HDP | BW<P10                  | 12        | 5.00        | 3.96        | 6.31        | <0.001           | 87.1               | <0.001           |
|                                          | BW<P5                   | 2         | 8.31        | 4.53        | 15.23       | <0.001           | 0.0                | 0.645            |
|                                          | BW<P3 or -2SD           | 3         | 6.78        | 4.29        | 10.70       | <0.001           | 0.0                | 0.670            |
|                                          | IUGR                    | 4         | 5.71        | 4.23        | 7.71        | <0.001           | 73.4               | 0.010            |
|                                          | <b>SGA/IUGR overall</b> | <b>21</b> | <b>5.62</b> | <b>4.77</b> | <b>6.62</b> | <b>&lt;0.001</b> | <b>80.0</b>        | <b>&lt;0.001</b> |
| Exposure:<br>HDP<br>Outcome:<br>SGA/IUGR | Any HDP                 | 3         | 6.22        | 2.32        | 13.79       | <0.001           | 80.3               | 0.006            |
|                                          | Preeclampsia            | 16        | 4.06        | 2.65        | 6.22        | <0.001           | 98.0               | <0.001           |
|                                          | Preeclampsia -HELLP     | 3         | 11.07       | 3.84        | 31.94       | <0.001           | 91.8               | <0.001           |
|                                          | <b>HDP overall</b>      | <b>22</b> | <b>4.86</b> | <b>3.36</b> | <b>7.01</b> | <b>&lt;0.001</b> | <b>97.6</b>        | <b>&lt;0.001</b> |

Mixed effects analysis. A random effects model is used to combine studies within each subgroup. A fixed effect model is used to combine subgroups and yield the overall effect. OR>1 indicates association with increased risk of the outcome and OR<1 indicates association with decreased risk of the outcome.

CI: confidence interval; GA: gestational age; HDP: hypertensive disorders of pregnancy; IUGR: intrauterine growth restriction (defined on the basis of fetal growth assessment); K: number of studies; OR: odds ratio; SGA: small for gestational age.

**Supplementary table 4. Raw count data of the meta-analysis on the association between HDP and BPD28.**

| Study Name                    | BPD28-yes/total |         | Study Name                   | BPD28-yes/total |         |
|-------------------------------|-----------------|---------|------------------------------|-----------------|---------|
|                               | HDP-yes         | HDP-no  |                              | HDP-yes         | HDP-no  |
| Abramovici 1999 <sup>6</sup>  | 21/47           | 277/419 | Naveda 2016 <sup>139</sup>   | 29/76           | 7/68    |
| Bursal 2017 <sup>29</sup>     | 13/140          | 16/144  | Newman 2011 <sup>140</sup>   | 18/35           | 62/121  |
| Cheng 2004 <sup>38</sup>      | 10/28           | 22/61   | Ozkan 2012 <sup>145</sup>    | 45/117          | 42/215  |
| Cunha 2005 <sup>43</sup>      | 11/29           | 34/57   | Palta 1996 <sup>146</sup>    | 18/121          | 134/511 |
| Demirel 2009 <sup>48</sup>    | 1/2             | 55/104  | Park 2012 <sup>147</sup>     | 11/38           | 58/153  |
| Duan 2016 <sup>51</sup>       | 16/48           | 55/195  | Schiff 1993 <sup>166</sup>   | 2/69            | 0/69    |
| Gray 1997 <sup>71</sup>       | 17/26           | 61/132  | Shima 2013 <sup>172</sup>    | 21/48           | 109/258 |
| Gursoy 2015 <sup>76</sup>     | 18/108          | 132/544 | Soliman 2017 <sup>175</sup>  | 39/102          | 86/217  |
| Hentges 2015 <sup>80</sup>    | 6/37            | 17/51   | Sun 2019 <sup>181</sup>      | 20/48           | 124/248 |
| Hernandez 2004 <sup>81</sup>  | 5/11            | 17/33   | Teberg 1991 <sup>183</sup>   | 3/44            | 57/189  |
| Hiett 2001 <sup>82</sup>      | 40/58           | 30/58   | Torrance 2007 <sup>187</sup> | 33/120          | 10/67   |
| Kim 1996 <sup>100</sup>       | 16/35           | 34/70   | Viscardi 2004 <sup>193</sup> | 15/36           | 136/226 |
| Koksal 2012 <sup>104</sup>    | 12/36           | 19/66   | Wang 2014 <sup>196</sup>     | 7/24            | 17/49   |
| Koroglu 2014 <sup>106</sup>   | 10/20           | 37/89   | Wilmink 2019 <sup>203</sup>  | 23/90           | 36/157  |
| Lardon-F 2017 <sup>111</sup>  | 21/47           | 39/82   | Withagen 2001 <sup>205</sup> | 33/222          | 51/444  |
| Madoglio 2016- <sup>120</sup> | 10/32           | 16/41   | Yilmaz 2017 <sup>212</sup>   | 4/12            | 10/28   |
|                               |                 |         | Zhang 2011 <sup>216</sup>    | 14/33           | 42/83   |

**Supplementary table 5. Raw count data of the meta-analysis on the association between SGA/IUGR and BPD28.**

| Study Name                      | BPD28-yes/total |             | Study Name                     | BPD28-yes/total            |             |
|---------------------------------|-----------------|-------------|--------------------------------|----------------------------|-------------|
|                                 | SGA/IUGR yes    | SGA/IUGR no |                                | SGA/IUGR yes               | SGA/IUGR no |
| Amin 1997 <sup>9</sup>          | 26/62           | 74/124      | Newman 2011 <sup>140</sup>     | 8/16                       | 72/140      |
| Bardin 1997 <sup>16</sup>       | 20/20           | 79/95       | Ruiz-P 2014 <sup>163</sup>     | OR 1.09 (95% CI 0.42-3.16) |             |
| Bose 2011 <sup>20</sup>         | 39/52           | 447/880     | Sharma 2004 <sup>170</sup>     | OR 1.09 (95% CI 0.64-1.86) |             |
| Bozzetti 2013 <sup>23</sup>     | 4/32            | 25/278      | Shima 2013 <sup>172</sup>      | 23 /48                     | 107/258     |
| Burns 1997 <sup>28</sup>        | 5/12            | 59/105      | Somaschini 2012 <sup>176</sup> | 13/46                      | 128/320     |
| Charafeddine 1999 <sup>34</sup> | 7/36            | 81/141      | Soudee 2014 <sup>177</sup>     | 22/39                      | 120/208     |
| Chye 1995 <sup>41</sup>         | 5/14            | 73/142      | Sun 2019 <sup>181</sup>        | 21/41                      | 123/255     |
| Enginner 2010 <sup>55</sup>     | 15/44           | 20/77       | Teberg 1991 <sup>183</sup>     | 16/60                      | 44/176      |
| Garite 2004 <sup>65</sup>       | 287/1451        | 4068/22978  | Viscardi 2004 <sup>193</sup>   | 6/15                       | 145/247     |
| Gortner 2003 <sup>70</sup>      | 7/74            | 2/74        | Wang L.Y. 2010 <sup>199</sup>  | 15/25                      | 41/47       |
| Greenough 2005 <sup>72</sup>    | 1/2             | 16/32       | Wirbelauer 2010 <sup>204</sup> | 7/18                       | 7/31        |
| Gursoy 2015 <sup>76</sup>       | 12/55           | 138/597     | Wocadlo 1994 <sup>206</sup>    | 9/18                       | 9/18        |
| Kim 2020 <sup>102</sup>         | 17/19           | 90/98       | Xydis 2013 <sup>209</sup>      | 3/33                       | 13/172      |
| Lal 2003 <sup>109</sup>         | 96/333          | 497/2212    | Yilmaz 2017 <sup>212</sup>     | 2/8                        | 12/32       |
| Malavolti 2018 <sup>122</sup>   | 32/53           | 325/557     | Yoon 1999 <sup>213</sup>       | 7/42                       | 27/161      |
| May 2009 <sup>126</sup>         | 9/14            | 37/66       | Zanardo 2002 <sup>215</sup>    | 13/18                      | 37/82       |
| Mello 2017 <sup>129</sup>       | 8/49            | 41/63       | Zhang 2011 <sup>216</sup>      | 11/36                      | 45/80       |

**Supplementary table 6. Raw count data of the meta-analysis on the association between HDP and BPD36.**

| Study Name                    | BPD36-yes/total |            | Study Name                     | BPD36-yes/total |           |
|-------------------------------|-----------------|------------|--------------------------------|-----------------|-----------|
|                               | HDP-yes         | HDP-no     |                                | HDP-yes         | HDP-no    |
| Ameenudeen 2007 <sup>8</sup>  | 11/74           | 23/159     | Mao 2018 <sup>123</sup>        | 8/13            | 11/26     |
| Baker 2012 <sup>14</sup>      | 3/13            | 10/49      | Marshall 1999 <sup>124</sup>   | 31/178          | 193/687   |
| Bose 2009 <sup>19</sup>       | 108/167         | 538/1074   | Matic 2017 <sup>125</sup>      | 137/379         | 624/2170  |
| Bossung <sup>21</sup>         | 368/2562        | 2030/13383 | McGowan 2009 <sup>127</sup>    | 6/22            | 41/74     |
| Cederqvist 2003 <sup>32</sup> | 9/11            | 9/21       | Mohamed 2015 <sup>131</sup>    | 12/16           | 51/80     |
| Çetinkaya 2010 <sup>33</sup>  | 13/51           | 6/33       | Morrow 2017 <sup>133</sup>     | 56/154          | 186/433   |
| Da Silva 2018 <sup>44</sup>   | 7/25            | 15/42      | Naeem 2020 <sup>136</sup>      | 17/24           | 9/12      |
| Dasgupta 2018 <sup>45</sup>   | 20/35           | 16/17      | Novitsky 2015 <sup>142</sup>   | 42/252          | 140/654   |
| De Souza 2015 <sup>47</sup>   | 3/30            | 3/30       | O'Shea 2012 <sup>143</sup>     | 52/138          | 280/613   |
| Dogan 2020 <sup>50</sup>      | 11/18           | 21/60      | Ozkan 2012 <sup>145</sup>      | 26/117          | 19/215    |
| Duan 2016b <sup>51</sup>      | 10/27           | 51/120     | Park 2012 <sup>147</sup>       | 9/38            | 46/153    |
| Eriksson 2015 <sup>56</sup>   | 139/534         | 395/1721   | Qi 2013 <sup>149</sup>         | 3/11            | 22/49     |
| Falciglia 2003 <sup>59</sup>  | 2/7             | 21/39      | Razak 2020 <sup>154</sup>      | 21/79           | 27/158    |
| Fujioka 2014 <sup>61</sup>    | 13/22           | 42/75      | Redline 2002 <sup>155</sup>    | 22/71           | 90/300    |
| Gagliardi 2013 <sup>63</sup>  | 63/441          | 204/1644   | Regev 2015 <sup>156</sup>      | 146/929         | 105/864   |
| Gagliardi 2014 <sup>64</sup>  | 459/2096        | 428/1510   | Rocha 2018 <sup>160</sup>      | 27/75           | 92/419    |
| Gemmell 2016 <sup>67</sup>    | 1523/3625       | 8235/24221 | Schlapbach 2010 <sup>167</sup> | 5/33            | 9/66      |
| Hansen 2010 <sup>78</sup>     | 12/29           | 15/78      | Shima 2013 <sup>172</sup>      | 8/48            | 45/258    |
| Iwatani 2013 <sup>86</sup>    | 7/10            | 19/41      | Shin 2020 <sup>173</sup>       | 91/203          | 673/1624  |
| Jeon 2020 <sup>89</sup>       | 31/55           | 221/466    | Silveira 2007 <sup>174</sup>   | 4/40            | 8/46      |
| Jo 2015 <sup>90</sup>         | 106/446         | 583/1690   | Soliman 2017 <sup>175</sup>    | 23/102          | 56/217    |
| Khan 2006 <sup>96</sup>       | 16/34           | 121/272    | Spiegler 2013 <sup>178</sup>   | 48/353          | 134/922   |
| Khan 2020 <sup>97</sup>       | 11/16           | 33/52      | Todd 1997 <sup>184</sup>       | 35/57           | 113/239   |
| Kim 1996 <sup>100</sup>       | 5/35            | 11/70      | Tokumasu 2016 <sup>185</sup>   | 136/331         | 1003/2887 |
| Kim 2018 <sup>101</sup>       | 24/59           | 37/140     | Torchin 2016 <sup>186</sup>    | 79/605          | 180/1506  |
| Klinger 2013 <sup>103</sup>   | 329/2470        | 1334/9669  | Turunen 2011 <sup>189</sup>    | 11/21           | 21/25     |
| Lardon-F 2017 <sup>111</sup>  | 10/47           | 15/82      | Uberos 2020 <sup>190</sup>     | 9/28            | 150/361   |
| Löfqvist 2012 <sup>117</sup>  | 9/23            | 49/85      | Wilmink 2019 <sup>203</sup>    | 12/90           | 15/157    |
| Lohmann 2014 <sup>118</sup>   | 5/7             | 5/15       | Won Choi 2006 <sup>207</sup>   | 6/19            | 20/56     |
| Madoglio 2016 <sup>120</sup>  | 4/32            | 9/41       | Yen 2013 <sup>211</sup>        | 204/847         | 1802/4906 |
| Mahlman 2017 <sup>121</sup>   | 23/47           | 37/127     |                                |                 |           |

**Supplementary table 7. Raw count data of the meta-analysis on the association between SGA/IUGR and BPD36.**

| Study Name                              | BPD36-yes/total             |             | Study Name                     | BPD36-yes/total            |             |
|-----------------------------------------|-----------------------------|-------------|--------------------------------|----------------------------|-------------|
|                                         | SGA/IUGR yes                | SGA/IUGR no |                                | SGA/IUGR yes               | SGA/IUGR no |
| Altman 2011 <sup>7</sup>                | 24/840                      | 44/5834     | Mahlman 2017 <sup>121</sup>    | 23/43                      | 37/131      |
| Ameenudeen 2007 <sup>8</sup>            | 3/40                        | 31/193      | Mao 2018 <sup>123</sup>        | 7/12                       | 12/27       |
| Aucott 2004 <sup>12</sup>               | 9/31                        | 11/64       | May 2009 <sup>126</sup>        | 9/14                       | 22/66       |
| Baer 2016 <sup>13</sup>                 | 179/8418                    | 1004/70233  | McGowan 2009 <sup>127</sup>    | 5/5                        | 44/93       |
| Baker 2012 <sup>14</sup>                | 3/6                         | 10/56       | Melamed 2016 <sup>128</sup>    | 164/918                    | 652/5649    |
| Bardin 1997 <sup>16</sup>               | 13/20                       | 30/95       | Mendez 2020 <sup>130</sup>     | 4/13                       | 11/88       |
| Bose 2009 <sup>19</sup>                 | 60/77                       | 579/1181    | Mohamed 2015 <sup>131</sup>    | 13/17                      | 50/79       |
| Brener 2017 <sup>24</sup>               | 9/45                        | 36/158      | Monier 2017 <sup>132</sup>     | 362/720                    | 1028/2199   |
| Brumbaugh 2018 <sup>25</sup>            | 10/13                       | 115/138     | Morrow 2017 <sup>133</sup>     | 66/158                     | 176/429     |
| Brumbaugh 2020 <sup>26</sup>            | 92/131                      | 1010/2179   | Nascimento 2020 <sup>137</sup> | 2/8                        | 19/32       |
| Candel 2016 <sup>30</sup>               | 17/72                       | 0/57        | Natarajan 2012 <sup>138</sup>  | 71/151                     | 80/1008     |
| Chen 2016 <sup>37</sup>                 | OR 2.15 (95% CI 1.75-2.64)  |             | Nobile 2017 <sup>141</sup>     | 31/98                      | 83/417      |
| Claas 2011 <sup>42</sup>                | 9/21                        | 48/80       | O'Shea 2012 <sup>143</sup>     | 43/127                     | 289/624     |
| De Jesus 2013 <sup>46</sup>             | 145/385                     | 928/2586    | Patel 2017 <sup>148</sup>      | 18/55                      | 59/199      |
| Duan 2016b <sup>51</sup>                | 5/11                        | 56/136      | Qi 2013 <sup>149</sup>         | 3/7                        | 22/53       |
| Durrmeyer 2012 <sup>53</sup>            | 12/23                       | 42/328      | Qiu 2012 <sup>150</sup>        | 322/1249                   | 2201/10660  |
| El Ayoubi 2016 <sup>54</sup>            | 110/446                     | 511/4139    | Rakza 2007 <sup>152</sup>      | 4/14                       | 6/30        |
| Eriksson 2015 <sup>56</sup>             | 185/482                     | 476/1757    | Ranke 2007 <sup>153</sup>      | 20/51                      | 18/46       |
| Estevez 2017 <sup>57</sup>              | 4/34                        | 1/76        | Regev 2003 <sup>157</sup>      | OR 3.42 (95% CI 2.28-5.12) |             |
| Fernandez-Rodriguez, 2021 <sup>60</sup> | 3/23                        | 5/71        | Reiss 2003 <sup>158</sup>      | 40/183                     | 145/1182    |
| Fujioka 2014 <sup>61</sup>              | 31/43                       | 24/54       | Rijken 2007 <sup>159</sup>     | 5/23                       | 30/135      |
| Gagliardi 2009 <sup>62</sup>            | 33/100                      | 159/1109    | Rocha 2010 <sup>161</sup>      | 9/53                       | 36/152      |
| Garofoli 2014 <sup>66</sup>             | 3/35                        | 4/41        | Rojas 2012 <sup>160</sup>      | 3/12                       | 61/200      |
| Giapros 2012 <sup>68</sup>              | 20/35                       | 39/133      | Ruiz-P 2014 <sup>163</sup>     | OR 2.88 (95% CI 1.20-6.91) |             |
| Gortner 1999 <sup>69</sup>              | 9/59                        | 11/258      | Sasi 2015 <sup>164</sup>       | 69/153                     | 54/306      |
| Grisaru-G 2012 <sup>73</sup>            | 106/408                     | 865/7505    | Serenius 2004 <sup>169</sup>   | OR 1.97 (95% CI 0.81-4.79) |             |
| Guimaraes 2010 <sup>74</sup>            | 7/47                        | 40/209      | Sharma 2004 <sup>170</sup>     | OR 2.20 (95% CI 1.20-4.03) |             |
| Hartung 2005 <sup>79</sup>              | 9/44                        | 0/44        | Shima 2013 <sup>172</sup>      | 15/48                      | 38/258      |
| Hikino 2012 <sup>83</sup>               | 0/5                         | 13/21       | Soliman 2017 <sup>175</sup>    | 13/24                      | 66/295      |
| Huusko 2015 <sup>84</sup> (Canada)      | 11/14                       | 47/112      | Somaschini 2012 <sup>176</sup> | 8/46                       | 68/318      |
| Huusko 2015 <sup>84</sup> (Finland)     | 56/156                      | 103/493     | Soudee 2014 <sup>177</sup>     | 16/35                      | 40/194      |
| Jakuskiene 2011 <sup>87</sup>           | OR 4.10 (95% CI 1.19-14.15) |             | Streubel 2008 <sup>180</sup>   | 5/19                       | 33/114      |
| Jensen 2019 <sup>88</sup>               | 288/631                     | 1494/5633   | Tammela 1992 <sup>182</sup>    | 2/17                       | 21/29       |
| Kalra 2014 <sup>91</sup>                | 5/7                         | 28/53       | Torchin 2016 <sup>186</sup>    | 90/481                     | 169/1630    |
| Karagianni 2011 <sup>94</sup>           | 13/52                       | 48/167      | Tsai 2015 <sup>188</sup>       | 230/451                    | 306/992     |
| Karagianni 2013 <sup>95</sup>           | 6/9                         | 22/52       | Uberos 2020 <sup>190</sup>     | 25/79                      | 134/310     |
| Khan 2020 <sup>97</sup>                 | 3/4                         | 41/64       | Vrilenich 1995 <sup>194</sup>  | 20/125                     | 75/281      |
| Klinger 2013 <sup>103</sup>             | 384/2515                    | 1279/9624   | Wadhawan 2007 <sup>195</sup>   | 517/1248                   | 3452/8213   |
| Korhonen 2004 <sup>105</sup>            | 6/20                        | 28/48       | Wang 2013 <sup>198</sup>       | 72/122                     | 783/1527    |
| Lal 2003 <sup>109</sup>                 | 74/348                      | 274/2195    | Wang L.Y. 2010 <sup>199</sup>  | 10/25                      | 41/47       |
| Lardon-Fdz 2017 <sup>111</sup>          | 18/40                       | 47/89       | Wemhoner 2011 <sup>201</sup>   | 3/8                        | 23/87       |
| Lehtinen 2017 <sup>112</sup>            | 12/25                       | 9/28        | Westby W 2009 <sup>202</sup>   | 15/31                      | 130/334     |



|                              |        |         |                           |       |         |
|------------------------------|--------|---------|---------------------------|-------|---------|
| Leroy 2018 <sup>113</sup>    | 7/9    | 25/53   | Xu 2016 <sup>208</sup>    | 2/4   | 30/38   |
| Lin 2005 <sup>115</sup>      | 28/62  | 84/162  | Xydis 2013 <sup>209</sup> | 14/33 | 106/172 |
| Lodha 2014 <sup>116</sup>    | 78/183 | 500/847 | Yu 2011 <sup>214</sup>    | 13/49 | 142/366 |
| Lofqvist 2012 <sup>117</sup> | 16/26  | 42/82   |                           |       |         |

**Supplementary table 8. Raw count data of the meta-analysis on the association between HDP and severe BPD.**

| Study Name                   | Severe BPD yes/total       |        | Study Name                     | Severe BPD yes/total |        |
|------------------------------|----------------------------|--------|--------------------------------|----------------------|--------|
|                              | HDP-yes                    | HDP-no |                                | HDP-yes              | HDP-no |
| EXPRESS 2010 <sup>58</sup>   | OR 2.00 (95% CI 1.00-4.00) |        | Newman 2011 <sup>140</sup>     | 8/35                 | 40/111 |
| Guo 2015 <sup>75</sup>       | 4/10                       | 44/65  | Ozkan 2012 <sup>145</sup>      | 14/117               | 16/215 |
| Kim 2014 <sup>99</sup>       | 3/5                        | 34/51  | Park 2012 <sup>147</sup>       | 5/31                 | 33/160 |
| Lardon-F 2017 <sup>111</sup> | 4/47                       | 5/82   | Somaschini 2017 <sup>176</sup> | 4/62                 | 32/304 |

**Supplementary table 9. Raw count data of the meta-analysis on the association between SGA/IUGR and severe BPD.**

| Study Name                   | Severe BPD yes/total       |             | Study Name                     | Severe BPD yes/total |             |
|------------------------------|----------------------------|-------------|--------------------------------|----------------------|-------------|
|                              | SGA/IUGR yes               | SGA/IUGR no |                                | SGA/IUGR yes         | SGA/IUGR no |
| Bose 2011 <sup>20</sup>      | 11/52                      | 75/880      | Lardon-F 2017 <sup>111</sup>   | 4/40                 | 5/89        |
| Brumbaugh 2018 <sup>25</sup> | 8/13                       | 75/138      | May 2009 <sup>126</sup>        | 5/14                 | 9/71        |
| Brumbaugh 2020 <sup>26</sup> | 16/131                     | 103/2179    | Monier 2017 <sup>132</sup>     | 72/720               | 131/2199    |
| EXPRESS 2010 <sup>58</sup>   | OR 1.90 (95% CI 1.10-3.28) |             | Morsing <sup>134</sup>         | 21/30                | 10/32       |
| Guo 2015 <sup>75</sup>       | 5/11                       | 43/67       | Newman 2011 <sup>140</sup>     | 5/16                 | 43/140      |
| Hadchouel 2020 <sup>77</sup> | 3/3                        | 8/16        | Somaschini 2017 <sup>176</sup> | 4/46                 | 32/320      |
| Imamura 2017 <sup>85</sup>   | 16/32                      | 51/137      | Wang 2010 <sup>199</sup>       | 3/15                 | 17/41       |
| Kim 2014 <sup>99</sup>       | 6/7                        | 31/49       | Xu 2016 <sup>208</sup>         | 2/4                  | 13/38       |
| Kim 2020 <sup>102</sup>      | 5/21                       | 16/98       |                                |                      |             |

**Supplementary table 10. Raw count data of the meta-analysis on the association between HDP and BPD36 or death.**

| Study Name                        | BPD36 or death yes/total |            | Study Name                       | BPD36 or death yes/total |          |
|-----------------------------------|--------------------------|------------|----------------------------------|--------------------------|----------|
|                                   | HDP-yes                  | HDP-no     |                                  | HDP-yes                  | HDP-no   |
| Balena 2017 <sup>15</sup>         | 25/66                    | 16/47      | Oh 2005 <sup>144</sup>           | 166/354                  | 631/1028 |
| Lapcharoensap 2015 <sup>110</sup> | 1172/2864                | 5909/12188 | Starr 2020 <sup>179</sup>        | 28/63                    | 218/483  |
| Li 2013 <sup>114</sup>            | 7/21                     | 51/139     | Van Mastrigt 2018 <sup>191</sup> | 11/25                    | 33/86    |
| Madoglio 2016 <sup>120</sup>      | 13/32                    | 20/40      | Wilmink 2019 <sup>203</sup>      | 21/99                    | 32/174   |

**Supplementary table 11. Raw count data of the meta-analysis on the association between SGA/IUGR and BPD36 or death.**

| Study Name                        | BPD36 or death-yes/total |             | Study Name                   | BPD36 or death-yes/total |             |
|-----------------------------------|--------------------------|-------------|------------------------------|--------------------------|-------------|
|                                   | SGA/IUGR yes             | SGA/IUGR no |                              | SGA/IUGR yes             | SGA/IUGR no |
| Botet 2012 <sup>22</sup>          | 37/149                   | 79/266      | Rakza 2007 <sup>152</sup>    | 7/17                     | 7/31        |
| Durrmeyer 2012 <sup>53</sup>      | 13/24                    | 86/372      | Regev 2003 <sup>156</sup>    | 235/406                  | 1019/2538   |
| Jensen 2019 <sup>88</sup>         | 400/743                  | 1826/5695   | Sasi 2015 <sup>164</sup>     | 70/153                   | 66/306      |
| Kandasamy 2015 <sup>93</sup>      | 16/35                    | 19/117      | Schena 2015 <sup>165</sup>   | 28/69                    | 77/173      |
| Lapcharoensap 2015 <sup>110</sup> | 483/919                  | 6598/14133  | Soudee 2014 <sup>177</sup>   | 32/51                    | 77/242      |
| Li 2013 <sup>114</sup>            | 9/21                     | 49/139      | Starr 2020 <sup>179</sup>    | 20/45                    | 226/501     |
| Lal 2003 <sup>109</sup>           | 147/401                  | 512/2433    | Tsai 2015 <sup>188</sup>     | 349/560                  | 434/1120    |
| Nobile 2017 <sup>141</sup>        | 60/98                    | 134/418     | Wadhawan 2007 <sup>195</sup> | 743/1248                 | 4496/8213   |
| Qiu 2012 <sup>150</sup>           | 471/1249                 | 3068/10660  | Westby 2009 <sup>202</sup>   | 25/31                    | 195/334     |

**Supplementary table 12. Raw count data of the meta-analysis on the association between HDP and BPD-associated pulmonary hypertension.**

| Study Name                   | BPD-associated PH yes/total |          | Study Name                          | BPD-associated PH no/total |        |
|------------------------------|-----------------------------|----------|-------------------------------------|----------------------------|--------|
|                              | HDP-yes                     | HDP-no   |                                     | HDP-yes                    | HDP-no |
| Blanca 2018 <sup>18</sup>    | 2/10                        | 5/56     | MacKenzie 2019 <sup>119</sup>       | 2/21                       | 22/63  |
| Bruno 2015 <sup>27</sup>     | 6/67                        | 31/236   | Mourani 2015 <sup>135</sup>         | 12/74                      | 27/193 |
| Carton 2016 <sup>31</sup>    | 4/19                        | 18/65    | Naeem 2020 <sup>136</sup>           | 3/17                       | 3/9    |
| Check 2013 <sup>35</sup>     | 11/32                       | 28/106   | Ra 2013 <sup>151</sup>              | 7/19                       | 11/66  |
| Choi 2019 <sup>39</sup>      | 3/5                         | 14/35    | Seo 2020 <sup>168</sup>             | 6/13                       | 18/68  |
| Dasgupta 2018 <sup>45</sup>  | 3/20                        | 5/16     | Sheth 2020 <sup>171</sup>           | 15/49                      | 44/171 |
| Kanaan 2018 <sup>92</sup>    | 19/106                      | 144/1234 | Vayalthrakkovil 2019 <sup>192</sup> | 4/18                       | 19/103 |
| Kim 2014 <sup>99</sup>       | 2/3                         | 13/34    | Wang 2018 <sup>197</sup>            | 6/13                       | 31/141 |
| Kunjunju 2017 <sup>107</sup> | 10/17                       | 12/39    | Weismann 2017 <sup>200</sup>        | 12/36                      | 32/124 |
| Lagata 2018 <sup>108</sup>   | 123/437                     | 247/1240 | Yallapragada 2016 <sup>210</sup>    | 2/2                        | 5/12   |

**Supplementary table 13. Raw count data of the meta-analysis on the association between SGA/IUGR and BPD-associated pulmonary hypertension.**

| Study Name                  | BPD-associated PH yes/total |             | Study Name                          | BPD-associated PH no/total |             |
|-----------------------------|-----------------------------|-------------|-------------------------------------|----------------------------|-------------|
|                             | SGA/IUGR yes                | SGA/IUGR no |                                     | SGA/IUGR yes               | SGA/IUGR no |
| An 2010 <sup>10</sup>       | 6/17                        | 23/99       | Khemani 2007 <sup>98</sup>          | 8/11                       | 10/31       |
| Aswani 2016 <sup>11</sup>   | 9/39                        | 10/191      | Kim 2014 <sup>99</sup>              | 3/6                        | 12/31       |
| Bhat 2012 <sup>17</sup>     | 12/26                       | 24/119      | Lagata 2018 <sup>108</sup>          | 141/403                    | 229/1274    |
| Bruno 2015 <sup>27</sup>    | 10/49                       | 27/254      | Mourani 2015 <sup>135</sup>         | 9/47                       | 30/230      |
| Carton 2016 <sup>31</sup>   | 2/11                        | 20/73       | Seo 2020 <sup>168</sup>             | 4/13                       | 20/68       |
| Check 2013 <sup>35</sup>    | 15/23                       | 24/115      | Sheth 2020 <sup>171</sup>           | 16/28                      | 43/192      |
| Chen 2020 <sup>36</sup>     | 12/21                       | 49/169      | Vayalthrakkovil 2019 <sup>192</sup> | 5/14                       | 19/97       |
| Choi 2015 <sup>39</sup>     | 15/52                       | 35/122      | Wang 2018 <sup>197</sup>            | 6/9                        | 31/145      |
| De Vries 2017 <sup>49</sup> | 6/100                       | 12/477      | Weismann 2017 <sup>200</sup>        | 9/30                       | 35/129      |
| Kanaan 2018 <sup>92</sup>   | 55/302                      | 108/1038    | Yallapragada 2016 <sup>210</sup>    | 4/5                        | 3/9         |

## References

1. Bramer WM, Milic J, Mast F. Reviewing retrieved references for inclusion in systematic reviews using EndNote. *JMLA*. 2017;**105**:84.
2. Wan X, Wang W, Liu J, Tong T. Estimating the sample mean and standard deviation from the sample size, median, range and/or interquartile range. *BMC Med Res Methodol* 2014;**14**:135.
3. Borenstein M, Hedges LV, Higgins J, Rothstein HR. Subgroup analyses. In: *Introduction to Meta-analysis* 2009:149-186.
4. Borenstein M, Hedges LV, Higgins J, Rothstein HR. Identifying and quantifying heterogeneity. In: *Introduction to Meta-Analysis* 2009:107-126.
5. Borenstein M, Hedges LV, Higgins J, Rothstein HR. Meta-Regression. In: *Introduction to Meta-Analysis* 2009:187-203.
6. Abramovici D, Friedman SA, Mercer BM, Audibert F, Kao L, Sibai BM. Neonatal outcome in severe preeclampsia at 24 to 36 weeks' gestation: does the HELLP (hemolysis, elevated liver enzymes, and low platelet count) syndrome matter? *Am J Obstet Gynecol*. 1999;**180**:221-225.
7. Altman M, Vanpée M, Cnattingius S, Norman M. Neonatal morbidity in moderately preterm infants: a Swedish national population-based study. *J Pediatr* 2011;**158**:239-244. e231.
8. Ameenudeen S, Boo N, Chan L. Risk factors associated with chronic lung disease in Malaysian very low birthweight infants. *Med J Malaysia* 2007;**62**:40-45.
9. Amin H, Singhal N, Sauve R. Impact of intrauterine growth restriction on neurodevelopmental and growth outcomes in very low birthweight infants. *Acta Paediatr* 1997;**86**:306-314.
10. An HS, Bae EJ, Kim GB, et al. Pulmonary hypertension in preterm infants with bronchopulmonary dysplasia. *Korean Circ J* 2010;**40**:131-136.
11. Aswani R, Hayman L, Nichols G, et al. Oxygen requirement as a screening tool for the detection of late pulmonary hypertension in extremely low birth weight infants. *Cardiol Young* 2016;**26**:521.
12. Aucott SW, Donohue PK, Northington FJ. Increased morbidity in severe early intrauterine growth restriction. *J Perinatol* 2004;**24**:435-440.
13. Baer R, Rogers E, Partridge J, et al. Population-based risks of mortality and preterm morbidity by gestational age and birth weight. *J Perinatol* 2016;**36**:1008-1013.
14. Baker CD, Balasubramanian V, Mourani PM, et al. Cord blood angiogenic progenitor cells are decreased in bronchopulmonary dysplasia. *Eur Respir J* 2012;**40**:1516-1522.
15. Balena-Borneman J, Ambalavanan N, Tiwari HK, Griffin RL, Halloran B, Askenazi D. Biomarkers associated with bronchopulmonary dysplasia/mortality in premature infants. *Pediatr Res* 2017;**81**:519-525.
16. Bardin C, Zolkowitz P, Papageorgiou A. Outcome of small-for-gestational age and appropriate-for-gestational age infants born before 27 weeks of gestation. *Pediatrics* 1997;**100**:e4-e4.
17. Bhat R, Salas AA, Foster C, Carlo WA, Ambalavanan N. Prospective analysis of pulmonary hypertension in extremely low birth weight infants. *Pediatrics* 2012;**129**:e682-e689.
18. Blanca AJ, Duijts L, van Mastrigt E, et al. Right ventricular function in infants with bronchopulmonary dysplasia and pulmonary hypertension: a pilot study. *Pulm Circ* 2018;**9**:2045894018816063.
19. Bose C, Van Marter LJ, Laughon M, et al. Fetal growth restriction and chronic lung disease among infants born before the 28th week of gestation. *Pediatrics* 2009;**124**:e450-e458.
20. Bose C, Laughon M, Allred EN, et al. Blood protein concentrations in the first two postnatal weeks that predict bronchopulmonary dysplasia among infants born before the 28th week of gestation. *Pediatr Res* 2011;**69**:347-353.
21. Bossung V, Fortmann ML, Fusch C, Rausch T, Herting E, Swoboda I, et al. Neonatal outcome after preeclampsia and HELLP syndrome: a population-based cohort study in Germany. *Front Pediatr* 2020;**8**.
22. Botet F, Figueras-Aloy J, Miracle-Echegoyen X, Rodríguez-Miguélez JM, Salvia-Roiges MD, Carbonell-Estrany X. Trends in survival among extremely-low-birth-weight infants (less than 1000 g) without significant bronchopulmonary dysplasia. *BMC pediatr* 2012;**12**:63.
23. Bozzetti V, Paterlini G, DeLorenzo P, et al. Feeding tolerance of preterm infants appropriate for gestational age (AGA) as compared to those small for gestational age (SGA). *J Matern Fetal Neonatal Med* 2013;**26**:1610-1615.
24. Brener-Dik PH, Gualdrón YMN, Galletti MF, Criolioli CM, Mariani GL. Bronchopulmonary dysplasia: incidence and risk factors. *Arch Argent Pediatr* 2017;**115**:476-482.
25. Brumbaugh JE, Colaizy TT, Patel NM, Klein JM. The changing relationship between bronchopulmonary dysplasia and cognition in very preterm infants. *Acta Paediatr* 2018;**107**:1339-1344.
26. Brumbaugh JE, Bell EF, Grey SF, et al. Behavior Profiles at 2 Years for Children Born Extremely Preterm with Bronchopulmonary Dysplasia. *J Pediatr* 2020.
27. Bruno CJ, Meerkov M, Capone C, et al. CRIB scores as a tool for assessing risk for the development of pulmonary hypertension in extremely preterm infants with bronchopulmonary dysplasia. *Am J Perinatol* 2015;**32**:1031-1037.
28. Burns Y, Gray P, O'Callaghan M. Bronchopulmonary dysplasia: a comparative study of motor development to two years of age. *Aust J Physiother*. 1997;**43**:19-25.
29. BURSAL DURAMAZ B BL, SALİHOĞLU O, ERTAŞ K, HATİPOĞLU S Neonatal outcomes of preterm infants born to preeclamptic mothers. *Marmara Med J* 2017;**30**:8-13.
30. Candel-Pau JC, Salinas FC, López JP, Lezcano AC, García OS, Olivé EL. Perinatal outcome and cardiac dysfunction in preterm growth-restricted neonates in relation to placental impairment severity. *An Pediatr (English Edition)* 2016;**85**:170-180.
31. Cartón Sánchez AJ. Hipertensión pulmonar estimada por ecocardiografía en prematuros con displasia broncopulmonar: frecuencia, evolución y factores de riesgo. *Tesis Doctoral* 2016. <https://repositorio.uam.es/handle/10486/674863>.
32. Cedergvist K, Haglund C, Heikkilä P, et al. Pulmonary trypsin-2 in the development of bronchopulmonary dysplasia in preterm infants. *Pediatrics* 2003;**112**:570-577.
33. Cetinkaya M, Ozkan H, Koksall N, Karali Z, Ozgur T. Neonatal outcomes of premature infants born to preeclamptic mothers. *J Matern Fetal Neonatal Med* 2010;**23**:425-430.
34. Charafeddine L, D'Angio CT, Phelps DL. Atypical chronic lung disease patterns in neonates. *Pediatrics* 1999;**103**:759-765.
35. Check J, Gotteiner N, Liu X, et al. Fetal growth restriction and pulmonary hypertension in premature infants with bronchopulmonary dysplasia. *J Perinatol* 2013;**33**:553-557.
36. Chen LL, Zmuda EJ, Talavera MM, et al. Dual-specificity phosphatase (DUSP) genetic variants predict pulmonary hypertension in patients with bronchopulmonary dysplasia. *Pediatr Res* 2020;**87**:81-87.

37. Chen F, Bajwa NM, Rimensberger PC, Posfay-Barbe KM, Pfister RE. Thirteen-year mortality and morbidity in preterm infants in Switzerland. *Arch Dis Child Fetal Neonatal Ed* 2016;**101**:F377-F383.
38. Cheng SW, Chou HC, Tsou KI, Fang LJ, Tsao PN. Delivery before 32 weeks of gestation for maternal pre-eclampsia: neonatal outcome and 2-year developmental outcome. *Early Hum Dev* 2004;**76**:39-46.
39. Choi EK, Jung YH, Kim H-S, et al. The impact of atrial left-to-right shunt on pulmonary hypertension in preterm infants with moderate or severe bronchopulmonary dysplasia. *Pediatr Neonatol* 2015;**56**:317-323.
40. Choi EK, Shin SH, Kim E-K, Kim H-S. Developmental outcomes of preterm infants with bronchopulmonary dysplasia-associated pulmonary hypertension at 18–24 months of corrected age. *BMC pediatr* 2019;**19**:26.
41. Chye J, Gray P. Rehospitalization and growth of infants with bronchopulmonary dysplasia: a matched control study. *J Paediatr Child Health* 1995;**31**:105-111.
42. Claas M, de Vries L, Koopman C, et al. Postnatal growth of preterm born children  $\leq$  750 g at birth. *Early Hum Dev* 2011;**87**:495-507.
43. Cunha GS, Mezzacappa F, Ribeiro JD. Risk factors for bronchopulmonary dysplasia in very low birth weight newborns treated with mechanical ventilation in the first week of life. *J Trop Pediatr* 2005;**51**:334-340.
44. da Silva Martins A, Méio MDBB, Saint Clair SG, Lima PAT, Milanese BG, Moreira MEL. Growth and body composition in preterm newborns with bronchopulmonary dysplasia: a cohort study. *J Perinat Med* 2018;**46**:913-918.
45. Dasgupta S, Aly AM, Malloy MH, Okorodudu AO, Jain SK. NTproBNP as a surrogate biomarker for early screening of pulmonary hypertension in preterm infants with bronchopulmonary dysplasia *J Perinatol* 2018;**38**:1252-1257.
46. De Jesus LC, Pappas A, Shankaran S, et al. Outcomes of small for gestational age infants born at < 27 weeks' gestation. *J Pediatr* 2013;**163**:55-60. e53.
47. De Souza-Rugolo LM, de Sa MP, Kurokawa CS, et al. There is no difference in nitric oxide metabolites and neonatal outcome between premature infants born to pre-eclamptic and those born to normotensive women. *Paediatr Int Child Health* 2015;**35**:47-52.
48. Demirel N, Bas AY, Zenciroglu A. Bronchopulmonary dysplasia in very low birth weight infants. *Indian J Pediatr* 2009;**76**:695-698.
49. DeVries L, Heyne R, Ramaciotti C, et al. Mortality among infants with evolving bronchopulmonary dysplasia increases with major surgery and with pulmonary hypertension. *J Perinatol* 2017;**37**:1043-1046.
50. Dogan P. The role of red cell distribution width as a predictor of bronchopulmonary dysplasia in preterm infants Haydarpasa Numune. *Med J* 2019;**60**:357-361.
51. Duan J, Kong X, Li Q, et al. Association between anemia and bronchopulmonary dysplasia in preterm infants. *Sci Rep* 2016;**6**:22717.
52. Duan J, Kong X, Li Q, et al. Association between Hemoglobin Levels in the First 3 Days of Life and Bronchopulmonary Dysplasia in Preterm Infants. *Am J Perinat* 2016;**33**:998-1002.
53. Durrmeyer X, Kayem G, Sinico M, Dassieu G, Danan C, Decobert F. Perinatal risk factors for bronchopulmonary dysplasia in extremely low gestational age infants: a pregnancy disorder-based approach. *J Pediatr* 2012;**160**:578-583. e572.
54. El Ayoubi M, Jarreau P-H, Van Reempts P, et al. Does the antenatal detection of fetal growth restriction (FGR) have a prognostic value for mortality and short-term morbidity for very preterm infants? Results from the MOSAIC cohort. *J Matern Fetal Neonatal Med* 2016;**29**:596-601.
55. Engineer N, Kumar S. Perinatal variables and neonatal outcomes in severely growth restricted preterm fetuses. *Acta Obstet Gynecol Scand* 2010;**89**:1174-1181.
56. Eriksson L, Haglund B, Odland V, Altman M, Ewald U, Kieler H. Perinatal conditions related to growth restriction and inflammation are associated with an increased risk of bronchopulmonary dysplasia. *Acta Paediatr* 2015;**104**:259-263.
57. Estévez Domingo M. Análisis de la morbimortalidad a corto y medio plazo en los recién nacidos prematuros pequeños para la edad gestacional. *Tesis Doctoral* 2017. <http://hdl.handle.net/10810/31149>
58. Express group. Incidence of and risk factors for neonatal morbidity after active perinatal care: extremely preterm infants study in Sweden (EXPRESS). *Acta Paediatr* 2010;**99**:978-992.
59. Falciglia HS, Johnson JR, Sullivan JA, et al. Role of antioxidant nutrients and lipid peroxidation in premature infants with respiratory distress syndrome and bronchopulmonary dysplasia. *Am J Perinatol* 2003;**20**:097-108.
60. Fernandez-Rodriguez B, de Alba C, Villalain C, Pallás CR, Galindo A, Herraiz I. Obstetric and pediatric growth charts for the detection of fetal growth restriction and neonatal adverse outcomes in preterm newborns before 34 weeks of gestation. *J Matern Fetal Neonatal Med* 2021;**34**(7):1112-9.
61. Fujioka K, Shibata A, Yokota T, et al. Association of a vascular endothelial growth factor polymorphism with the development of bronchopulmonary dysplasia in Japanese premature newborns. *Sci Rep* 2014;**4**:4459.
62. Gagliardi L, Bellù R, Zanini R, Dammann O. Bronchopulmonary dysplasia and brain white matter damage in the preterm infant: a complex relationship. *Paediatr Perinat Epidemiol* 2009;**23**:582-590.
63. Gagliardi L, Rusconi F, Da Fre M, et al. Pregnancy disorders leading to very preterm birth influence neonatal outcomes: results of the population-based ACTION cohort study. *Pediatr Res* 2013;**73**:794-801.
64. Gagliardi L, Rusconi F, Bellu R, Zanini R. Association of maternal hypertension and chorioamnionitis with preterm outcomes. *Pediatrics* 2014;**134**:e154-161.
65. Garite TJ, Clark R, Thorp JA. Intrauterine growth restriction increases morbidity and mortality among premature neonates. *Am J Obstet Gynecol* 2004;**191**:481-487.
66. Garofoli F, Ciardelli L, Mazzucchelli I, et al. The red cell distribution width (RDW): value and role in preterm, IUGR (intrauterine growth restricted), full-term infants. *Hematology* 2014;**19**:365-369.
67. Gemmell L, Martin L, Murphy KE, et al. Hypertensive disorders of pregnancy and outcomes of preterm infants of 24 to 28 weeks' gestation. *J Perinatol* 2016;**36**:1067-1072.
68. Giapros V, Drougia A, Krallis N, Theocharis P, Andronikou S. Morbidity and mortality patterns in small-for-gestational age infants born preterm. *J Matern Fetal Neonatal Med* 2012;**25**:153-157.
69. Gortner L, Wauer RR, Stock GJ, et al. Neonatal outcome in small for gestational age infants: do they really better? *J Perinat Med* 1999;**27**:484-489.
70. Gortner L, van Husen M, Thyen U, Gembruch U, Friedrich H-J, Landmann E. Outcome in preterm small for gestational age infants compared to appropriate for gestational age preterms at the age of 2 years: a prospective study. *Eur J Obstet Gynecol Reprod Biol* 2003;**110**:S93-S97.
71. Gray PH, Hurley TM, Rogers YM, et al. Survival and neonatal and neurodevelopmental outcome of 24-29 week gestation infants according to primary cause of preterm delivery. *Aust N Z J Obstet Gynaecol* 1997;**37**:161-168.
72. Greenough A, Dimitriou G, Bhat RY, et al. Lung volumes in infants who had mild to moderate bronchopulmonary dysplasia. *Eur J Pediatr* 2005;**164**:583-586.

73. Grisar-Granovsky S, Reichman B, Lerner-Geva L, et al. Mortality and morbidity in preterm small-for-gestational-age infants: a population-based study. *Am J Obstet Gynecol* 2012;**206**:150. e151-150. e157.
74. Guimarães H, Rocha G, Vasconcellos G, et al. Factores de risco de displasia broncopulmonar em cinco unidades portuguesas de cuidados intensivos neonatais. *Rev Port Pneumol (English Edition)* 2010;**16**:419-430.
75. Guo MM-H, Chung C-H, Chen F-S, Chen C-C, Huang H-C, Chung M-Y. Severe bronchopulmonary dysplasia is associated with higher fluid intake in very low-birth-weight infants: a retrospective study. *Am J Perinatol* 2015;**32**:155-162.
76. Gursoy T, Hayran M, Derin H, Ovali F. A clinical scoring system to predict the development of bronchopulmonary dysplasia. *Am J Perinatol* 2015;**32**:659-666.
77. Hadchouel A, Decobert F, Besmond C, Delacourt C. Exome sequencing of extreme phenotypes in bronchopulmonary dysplasia. *Eur J Pediatr* 2020;**179**:579-586.
78. Hansen AR, Barnés CM, Folkman J, McElrath TF. Maternal preeclampsia predicts the development of bronchopulmonary dysplasia. *J Pediatr* 2010;**156**:532-536.
79. Hartung J, Kalache K, Heyna C, et al. Outcome of 60 neonates who had ARED flow prenatally compared with a matched control group of appropriate-for-gestational age preterm neonates. *Ultrasound Obstet Gynecol* 2005;**25**:566-572.
80. Hentges CR, Silveira RC, Procianny RS. Angiogenic and Antiangiogenic Factors in Preterm Neonates Born to Mothers with and without Preeclampsia. *Am J Perinatol* 2015;**32**:1185-1190.
81. Hernandez-Ronquillo L, Tellez-Zenteno JF, Weder-Cisneros N, Salinas-Ramirez V, Zapata-Pallagi JA, da Silva O. Risk factors for the development of bronchopulmonary dysplasia: a case-control study. *Arch Med Res* 2004;**35**:549-553.
82. Hiett AK, Brown HL, Britton KA. Outcome of infants delivered between 24 and 28 weeks' gestation in women with severe preeclampsia. *J Matern Fetal Med* 2001;**10**:301-304.
83. Hikino S, Ohga S, Kinjo T, et al. Tracheal aspirate gene expression in preterm newborns and development of bronchopulmonary dysplasia. *Pediatr Int* 2012;**54**:208-214.
84. Huusko JM, Mahlman M, Karjalainen MK, et al. Polymorphisms of the gene encoding Kit ligand are associated with bronchopulmonary dysplasia. *Pediatr Pulmonol* 2015;**50**:260-270.
85. Imamura T, Sato M, Go H, et al. The microbiome of the lower respiratory tract in premature infants with and without severe bronchopulmonary dysplasia. *Am J Perinatol* 2017;**34**:80-87.
86. Iwatani S, Mizobuchi M, Tanaka S, et al. Increased volume of tracheal aspirate fluid predicts the development of bronchopulmonary dysplasia. *Early Hum Dev* 2013;**89**:113-117.
87. Jakuskiene R, Vollmer B, Saferis V, Daugeliene D. Neonatal outcomes of very preterm infants admitted to a tertiary center in Lithuania between the years 2003 and 2005. *Eur J Pediatr* 2011;**170**:1293-1303.
88. Jensen EA, Foglia EE, Dysart KC, et al. Adverse effects of small for gestational age differ by gestational week among very preterm infants. *Arch Dis Child Fetal Neonatal Ed* 2019;**104**:F192-F198.
89. Jeon GW. Changes in the Incidence of Bronchopulmonary Dysplasia among Preterm Infants in a Single Center over 10 Years. *Neonatal Med* 2020;**27**:1-7.
90. Jo HS, Cho KH, Cho SI, Song ES, Kim BI. Recent Changes in the Incidence of Bronchopulmonary Dysplasia among Very-Low-Birth-Weight Infants in Korea. *J Korean Med Sci*. 2015;**30** Suppl 1:S81-87.
91. Kalra VK, Aggarwal S, Arora P, Natarajan G. B-type natriuretic peptide levels in preterm neonates with bronchopulmonary dysplasia: A marker of severity? *Pediatr Pulmonol* 2014;**49**:1106-1111.
92. Kanaan U, Srivatsa B, Huckaby J, Kelleman M. Association of unit-wide oxygen saturation target on incidence of pulmonary hypertension in very low birthweight premature infants. *J Perinatol* 2018;**38**:148-153.
93. Kandasamy J, Roane C, Szalai A, Ambalavanan N. Serum eotaxin-1 is increased in extremely-low-birth-weight infants with bronchopulmonary dysplasia or death. *Pediatr Res* 2015;**78**:498-504.
94. Karagianni P, Tsakalidis C, Kyriakidou M, et al. Neuromotor outcomes in infants with bronchopulmonary dysplasia. *Pediatr Neurol* 2011;**44**:40-46.
95. Karagianni P, Rallis D, Fidani L, et al. Glutathione-S-Transferase P1 polymorphisms association with bronchopulmonary dysplasia in preterm infants. *Hippokratia* 2013;**17**:363.
96. Khan MA, Kuzma-O'Reilly B, Brodsky N, Bhandari V. Site-specific characteristics of infants developing bronchopulmonary dysplasia. *J Perinatol* 2006;**26**:428-435.
97. Khan S, Concina VA, Schneider D, Westgate P, Arriagada S, Bada H. Role of NT-proBNP in the prediction of moderate to severe Bronchopulmonary Dysplasia in preterm infants. *Pediatr Pulmonol* 2020;**55**:376-382.
98. Khemani E, McElhinney DB, Rhein L, et al. Pulmonary artery hypertension in formerly premature infants with bronchopulmonary dysplasia: clinical features and outcomes in the surfactant era. *Pediatrics* 2007;**120**:1260-1269.
99. Kim D-H, Kim H-S. Serial changes of serum endostatin and angiotensin-1 levels in preterm infants with severe bronchopulmonary dysplasia and subsequent pulmonary artery hypertension. *Neonatology* 2014;**106**:55-61.
100. Kim CR, Vohr BR, Oh W. Effects of maternal hypertension in very-low-birth-weight infants. *Arch Pediatr Adolesc Med* 1996;**150**:686-691.
101. Kim DH, Shin SH, Kim EK, Kim HS. Association of increased cord blood soluble endoglin with the development of bronchopulmonary dysplasia in preterm infants with maternal preeclampsia. *Pregnancy Hypertens* 2018;**13**:148-153.
102. Kim YH, Kim KW, Eun HS, et al. Small for gestational age birth may increase airflow limitation in bronchopulmonary dysplasia. *Pediatr Pulmonol* 2020;**55**:346-353.
103. Klinger G, Sokolover N, Boyko V, et al. Perinatal risk factors for bronchopulmonary dysplasia in a national cohort of very-low-birthweight infants. *Am J Obstet Gynecol* 2013;**208**:115. e111-115. e119.
104. Koksai N, Kayik B, Çetinkaya M, et al. Value of serum and bronchoalveolar fluid lavage pro-and anti-inflammatory cytokine levels for predicting bronchopulmonary dysplasia in premature infants. *Eur Cytokine Netw* 2012;**23**:29-35.
105. Korhonen P, Laitinen J, Hyödynmaa E, Tammela O. Respiratory outcome in school-aged, very-low-birth-weight children in the surfactant era. *Acta Paediatr* 2004;**93**:316-321.
106. Koroglu OA, Yalaz M, Levent E, Akisu M, Kültürsay N. Cardiovascular consequences of bronchopulmonary dysplasia in prematurely born preschool children. *Neonatology* 2013;**104**:283-289.
107. Kunjunju A, Gopagondanahalli K, Chan Y, Sehgal A. Bronchopulmonary dysplasia-associated pulmonary hypertension: clues from placental pathology. *J Perinatol* 2017;**37**:1310-1314.
108. Lagatta JM, Hysinger EB, Zaniletti I, et al. The impact of pulmonary hypertension in preterm infants with severe bronchopulmonary dysplasia through 1 year. *The J Pediatr* 2018;**203**:218-224. e213.
109. Lal MK, Manktelow BN, Draper ES, Field DJ. Chronic lung disease of prematurity and intrauterine growth retardation: a population-based study. *Pediatrics* 2003;**111**:483-487.
110. Lapcharoensap W, Gage SC, Kan P, et al. Hospital variation and risk factors for bronchopulmonary dysplasia in a population-based cohort. *JAMA Pediatr* 2015;**169**:e143676-e143676.

111. Lardon-Fernandez M, Uberos J, Molina-Oya M, Narbona-Lopez E. Epidemiological factors involved in the development of bronchopulmonary dysplasia in very low birth-weight preterm infants. *Minerva Pediatr* 2017;**69**:42-49.
112. Lehtinen A, Korhonen P, Hyödynmaa E, et al. Adipokines played a limited role in predicting temporary growth differences between very low birthweight infants with and without bronchopulmonary dysplasia. *Acta Paediatr* 2017;**106**:1583-1588.
113. Leroy S, Caumette E, Waddington C, Hébert A, Brant R, Lavoie PM. A time-based analysis of inflammation in infants at risk of bronchopulmonary dysplasia. *J Pediatr* 2018;**192**:60-65. e61.
114. Li Y, Yan J, Li M, et al. Addition of SNAP to perinatal risk factors improves the prediction of bronchopulmonary dysplasia or death in critically ill preterm infants. *BMC pediatr* 2013;**13**:138.
115. Lin H-C, Su B-H, Chang J-S, Hsu C-M, Tsai C-H, Tsai F-J. Nonassociation of interleukin 4 intron 3 and 590 promoter polymorphisms with bronchopulmonary dysplasia for ventilated preterm infants. *Neonatology* 2005;**87**:181-186.
116. Lodha A, Sauve R, Bhandari V, et al. Need for supplemental oxygen at discharge in infants with bronchopulmonary dysplasia is not associated with worse neurodevelopmental outcomes at 3 years corrected age. *PLoS One* 2014;**9**.
117. Löfqvist C, Hellgren G, Niklasson A, et al. Low postnatal serum IGF-I levels are associated with bronchopulmonary dysplasia (BPD). *Acta Paediatr* 2012;**101**:1211-1216.
118. Lohmann P, Luna RA, Hollister EB, et al. The airway microbiome of intubated premature infants: characteristics and changes that predict the development of bronchopulmonary dysplasia. *Pediatr Res* 2014;**76**:294-301.
119. MacKenzie K, Cunningham K, Thomas S, et al. Incidence, risk factors, and outcomes of pulmonary hypertension in preterm infants with bronchopulmonary dysplasia. *J Paediatr Child Health* 2020;**25**:222-227.
120. Madoglio RJ, Rugolo LM, Kurokawa CS, Sa MP, Lyra JC, Antunes LC. Inflammatory and oxidative stress airway markers in premature newborns of hypertensive mothers. *Braz J Med Biol Res* 2016;**49**:e5160.
121. Mahlman M, Karjalainen MK, Huusko JM, et al. Genome-wide association study of broncho pulmonary dysplasia: a potential role for variants near the CRP gene. *Sci Rep* 2017;**7**:9271.
122. Malavolti AM, Bassler D, Arlettaz-Mieth R, Faldella G, Latal B, Natalucci G. Bronchopulmonary dysplasia—impact of severity and timing of diagnosis on neurodevelopment of preterm infants: a retrospective cohort study. *BMJ Paediatr Open* 2018;**2**.
123. Mao X, Qiu J, Zhao L, et al. Vitamin D and IL-10 deficiency in preterm neonates with bronchopulmonary dysplasia. *Front Pediatr* 2018;**6**:246.
124. Marshall DD, Kotelchuck M, Young TE, Bose CL, Kruyer L, O'Shea TM. Risk factors for chronic lung disease in the surfactant era: a North Carolina population-based study of very low birth weight infants. North Carolina Neonatologists Association. *Pediatrics* 1999;**104**:1345-1350.
125. Matic M, Inati V, Abdel-Latif ME, Kent AL. Maternal hypertensive disorders are associated with increased use of respiratory support but not chronic lung disease or poorer neurodevelopmental outcomes in preterm neonates at <29 weeks of gestation. *J Paediatr Child Health* 2017;**53**:391-398.
126. May C, Williams O, Milner A, et al. Relation of exhaled nitric oxide levels to development of bronchopulmonary dysplasia. *Arch Dis Child Fetal Neonatal Ed* 2009;**94**:F205-F209.
127. McGowan EC, Kostadinov S, McLean K, et al. Placental IL-10 dysregulation and association with bronchopulmonary dysplasia risk. *Pediatr Res* 2009;**66**:455-460.
128. Melamed N, Pittini A, Barrett J, et al. Antenatal corticosteroids and outcomes of small-for-gestational-age neonates. *Obstet Gynecol* 2016;**128**:1001-1008.
129. de Mello RR, Rodrigues Reis AB, da Silva KS. Cognitive performance of premature infants: association between bronchopulmonary dysplasia and cognitive skills. Cross-sectional study. *Sao Paulo Med J* 2017;**135**:383-390.
130. Méndez-Abad P, Zafra-Rodríguez P, Lubián-López S, Benavente-Fernández I. Myocardial function maturation in very-low-birth-weight infants and development of bronchopulmonary dysplasia. *Front Pediatr* 2020;**7**:556.
131. Mohamed I, Elremaly W, Rouleau T, Lavoie J-C. Oxygen and parenteral nutrition two main oxidants for extremely preterm infants: 'it all adds up'. *J Neonatal Perinatal Med* 2015;**8**:189-197.
132. Monier I, Ancel P-Y, Ego A, et al. Fetal and neonatal outcomes of preterm infants born before 32 weeks of gestation according to antenatal vs postnatal assessments of restricted growth. *Am J Obstet Gynecol* 2017;**216**:516. e511-516. e510.
133. Morrow LA, Wagner BD, Ingram DA, et al. Antenatal determinants of bronchopulmonary dysplasia and late respiratory disease in preterm infants. *Am J Respir Crit Care Med* 2017;**196**:364-374.
134. Morsing E, Gustafsson P, Brodzski J. Lung function in children born after foetal growth restriction and very preterm birth. *Acta Paediatr* 2012;**101**:48-54.
135. Mourani PM, Sontag MK, Younoszai A, et al. Early pulmonary vascular disease in preterm infants at risk for bronchopulmonary dysplasia. *Am J Respir Crit Care Med* 2015;**191**:87-95.
136. Naeem B, Ayub A, Aly AM, Malloy MH, Okorodudu AO, Jain SK. Urinary NT-proBNP as a potential noninvasive biomarker for screening of pulmonary hypertension in preterm infants: a pilot study. *J Perinatol* 2020;**40**:628-632.
137. Nascimento CP, Maia LP, Alves PT, et al. Invasive mechanical ventilation and biomarkers as predictors of bronchopulmonary dysplasia in preterm infants. *J Pediatr* 2020.
138. Natarajan G, Pappas A, Shankaran S, et al. Outcomes of extremely low birth weight infants with bronchopulmonary dysplasia: impact of the physiologic definition. *Early Hum Dev* 2012;**88**:509-515.
139. Naveda Romero OE. Risk factors for the development of bronchopulmonary dysplasia: A case-control study. [Spanish]. *Pediatrics* 2016;**49**:1-7.
140. Newman JB, DeBastos AG, Batton D, Raz S. Neonatal respiratory dysfunction and neuropsychological performance at the preschool age: a study of very preterm infants with bronchopulmonary dysplasia. *Neuropsychology* 2011;**25**:666-678.
141. Nobile S, Marchionni P, Carnielli VP. Neonatal outcome of small for gestational age preterm infants. *European J Pediatr* 2017;**176**:1083-1088.
142. Novitsky A, Tuttle D, Locke RG, Saiman L, Mackley A, Paul DA. Prolonged Early Antibiotic Use and Bronchopulmonary Dysplasia in Very Low Birth Weight Infants. *Am J Perinatol* 2015;**32**:043-048.
143. O'Shea JE, Davis PG, Doyle LW, Victorian Infant C. Maternal preeclampsia and risk of bronchopulmonary dysplasia in preterm infants. *Pediatr Res* 2012;**71**:210-214.
144. Oh W, Poindexter BB, Perritt R, et al. Association between fluid intake and weight loss during the first ten days of life and risk of bronchopulmonary dysplasia in extremely low birth weight infants. *J Pediatr* 2005;**147**:786-790.
145. Ozkan H, Cetinkaya M, Koksall N. Increased incidence of bronchopulmonary dysplasia in preterm infants exposed to preeclampsia. *J Matern Fetal Neona* 2012;**25**:2681-2685.
146. Palta M, Sadek M, Gabbert D, et al. The relation of maternal complications to outcomes in very low birthweight infants in an era of changing neonatal care. *American J Perinatol* 1996;**13**:109-114.
147. Park YH, Lee GM, Yoon JM, et al. Effect of early postnatal neutropenia in very low birth weight infants born to mothers with pregnancy-induced hypertension. *Korean J Pediatr* 2012;**55**:462-469.

148. Patel AL, Johnson TJ, Robin B, et al. Influence of own mother's milk on bronchopulmonary dysplasia and costs. *Arch Dis Child Fetal Neonatal Ed* 2017;**102**:F256-F261.
149. Qi Y, Jiang Q, Chen C, Cao Y, Qian L. Circulating endothelial progenitor cells decrease in infants with bronchopulmonary dysplasia and increase after inhaled nitric oxide. *PLoS One* 2013;**8**:e79060.
150. Qiu X, Lodha A, Shah PS, et al. Neonatal outcomes of small for gestational age preterm infants in Canada. *Am J Perinatol* 2012;**29**:87-94.
151. Ra JJ, Lee SM, Eun HS, et al. Risk factors of pulmonary hypertension in preterm infants with chronic lung disease. 2013.
152. Rakza T, Magnenant E, Klosowski S, Tourneux P, Bachiri A, Storme L. Early hemodynamic consequences of patent ductus arteriosus in preterm infants with intrauterine growth restriction. *J Pediatr* 2007;**151**:624-628.
153. Ranke MB, Vollmer B, Traunecker R, et al. Growth and development are similar in VLBW children born appropriate and small for gestational age: an interim report on 97 preschool children. *J Pediatr Endocrinol Metab* 2007;**20**:1017-1026.
154. Razak A, Patel W, Durrani N, et al. Neonatal respiratory outcomes in pregnancy induced hypertension: introducing a novel index. *J Matern Fetal Neonatal Med* 2020;**33**:625-632.
155. Redline RW, Wilson-Costello D, Hack M. Placental and other perinatal risk factors for chronic lung disease in very low birth weight infants. *Pediatr Res* 2002;**52**:713-719.
156. Regev RH, Arnon S, Litmanovitz I, et al. Outcome of singleton preterm small for gestational age infants born to mothers with pregnancy-induced hypertension. A population-based study. *J Matern Fetal Neonatal Med* 2015;**28**:666-673.
157. Regev RH, Lusky A, Dolfin T, et al. Excess mortality and morbidity among small-for-gestational-age premature infants: a population-based study. *J Pediatr* 2003;**143**:186-191.
158. Reiss I, Landmann E, Heckmann M, Misselwitz B, Gortner L. Increased risk of bronchopulmonary dysplasia and increased mortality in very preterm infants being small for gestational age. *Arch Gynecol Obstet* 2003;**269**:40-44.
159. Rijken M, Wit JM, Veen S. Similar growth in preterm infants with intra- or extrauterine growth restriction. *A Regional Follow-Up Study at Two Years of Age in Extremely Preterm and Very Preterm Infants* 2007;**73**.
160. Rocha G, de Lima FF, Machado AP, Guimarães H. Preeclampsia predicts higher incidence of bronchopulmonary dysplasia. *J Perinatol* 2018;**38**:1165-1173.
161. Rocha G, Ribeiro O, Guimarães H. Fluid and electrolyte balance during the first week of life and risk of bronchopulmonary dysplasia in the preterm neonate. *Clinics* 2010;**65**:663-674.
162. Rojas MX, Rojas MA, Lozano JM, Rondón MA, Charry LP. Regional variation on rates of bronchopulmonary dysplasia and associated risk factors. *ISRN Pediatrics* 2012;**2012**: 685151.
163. Ruiz-Peláez JG, Charpak N. Epidemia de displasia broncopulmonar: incidencia y factores asociados en una cohorte de niños prematuros en Bogotá, Colombia. *Biomédica* 2014;**34**:29-39.
164. Sasi A, Abraham V, Davies-Tuck M, et al. Impact of intrauterine growth restriction on preterm lung disease. *Acta Paediatr* 2015;**104**:e552-e556.
165. Schena F, Francescato G, Cappelleri A, et al. Association between hemodynamically significant patent ductus arteriosus and bronchopulmonary dysplasia. *J Pediatr* 2015;**166**:1488-1492.
166. Schiff E, Friedman SA, Mercer BM, Sibai BM. Fetal lung maturity is not accelerated in preeclamptic pregnancies. *Am J Obstet Gynecol* 1993;**169**:1096-1101.
167. Schlapbach LJ, Ersch J, Adams M, Bernet V, Bucher HU, Latal B. Impact of chorioamnionitis and preeclampsia on neurodevelopmental outcome in preterm infants below 32 weeks gestational age. *Acta Paediatr* 2010;**99**:1504-1509.
168. Seo YM, Yum SK, Sung IK. Respiratory Severity Score with Regard to Birthweight during the Early Days of Life for Predicting Pulmonary Hypertension in Preterm Infants. *J Trop Pediatr* 2020.
169. Serenius F, Ewald U, Farooqi A, Holmgren PÅ, Håkansson S, Sedin G. Short-term outcome after active perinatal management at 23–25 weeks of gestation. A study from two Swedish tertiary care centres. Part 2: infant survival. *Acta Paediatr* 2004;**93**:1081-1089.
170. Sharma P, McKay K, Rosenkrantz TS, Hussain N. Comparisons of mortality and pre-discharge respiratory outcomes in small-for-gestational-age and appropriate-for-gestational-age premature infants. *BMC pediatr* 2004;**4**:9.
171. Sheth S, Goto L, Bhandari V, Abraham B, Mowes A. Factors associated with development of early and late pulmonary hypertension in preterm infants with bronchopulmonary dysplasia. *J Perinatol* 2020;**40**:138-148.
172. Shima Y, Kumasaka S, Migita M. Perinatal risk factors for adverse long-term pulmonary outcome in premature infants: Comparison of different definitions of bronchopulmonary dysplasia/chronic lung disease. *Pediatr Int* 2013;**55**:578-581.
173. Shin SH, Shin SH, Kim SH, et al. The Association of Pregnancy-induced Hypertension with Bronchopulmonary Dysplasia—A Retrospective Study Based on the Korean Neonatal Network database. *Sci Rep* 2020;**10**:1-6.
174. Silveira RC, Procianny RS. Growth and neurodevelopment outcome of very low birth weight infants delivered by preeclamptic mothers. *Acta Paediatr* 2007;**96**:1738-1742.
175. Soliman N, Chaput K, Alshaikh B, Yusuf K. Preeclampsia and the risk of bronchopulmonary dysplasia in preterm infants less than 32 weeks' gestation. *Am J Perinatol* 2017;**34**:585-592.
176. Somaschini M, Castiglioni E, Volonteri C, Cursi M, Ferrari M, Carrera P. Genetic predisposing factors to bronchopulmonary dysplasia: preliminary data from a multicentre study. *J Matern Fetal Neonatal Med* 2012;**25**:119-122.
177. Soudée S, Vuillemin L, Alberti C, et al. Fetal growth restriction is worse than extreme prematurity for the developing lung. *Neonatology* 2014;**106**:304-310.
178. Spiegler J, Stichtenoth G, Weichert J, et al. Pregnancy risk factors for very premature delivery: what role do hypertension, obesity and diabetes play? *Arch Gynecol Obstet* 2013;**288**:57-64.
179. Starr MC, Boohaker L, Eldredge LC, et al. Acute kidney injury and bronchopulmonary dysplasia in premature neonates born less than 32 weeks' gestation. *Am J Perinatol* 2020;**37**:341-348.
180. Streubel A, Donohue PK, Aucott SW. The epidemiology of atypical chronic lung disease in extremely low birth weight infants. *J Perinatol* 2008;**28**:141-148.
181. Sun Y, Chen C, Zhang X, et al. High neutrophil-to-lymphocyte ratio is an early predictor of bronchopulmonary dysplasia. *Front Pediatr* 2019;**7**:464.
182. Tammela OK, Koivisto ME. A 1-year follow-up of low birth weight infants with and without bronchopulmonary dysplasia: health, growth, clinical lung disease, cardiovascular and neurological sequelae. *Early Hum Dev* 1992;**30**:109-120.
183. Teberg AJ, Pena I, Finello K, Aguilar T, Hodgman JE. Prediction of neurodevelopmental outcome in infants with and without bronchopulmonary dysplasia. *Am J Med Sci* 1991;**301**:369-374.
184. Todd DA, Jana A, John E. Chronic oxygen dependency in infants born at 24-32 weeks' gestation: The role of antenatal and neonatal factors. *J Paediatr Child Health* 1997;**33**:402-407.
185. Tokumasu H, Tokumasu S, Kawakami K. Impact of pre-eclampsia in extremely premature infants: Population-based study. *Pediatr Int* 2016;**58**:578-583.



186. Torchin H, Ancel PY, Goffinet F, et al. Placental Complications and Bronchopulmonary Dysplasia: EPIPAGE-2 Cohort Study. *Pediatrics* 2016;**137**:e20152163.
187. Torrance HL, Mulder EJ, Brouwers HA, van Bel F, Visser GH. Respiratory outcome in preterm small for gestational age fetuses with or without abnormal umbilical artery Doppler and/or maternal hypertension. *J Matern Fetal Neonat* 2007;**20**:613-621.
188. Tsai L-Y, Chen Y-L, Tsou K-I, Mu S-C, Group TPIDCS. The impact of small-for-gestational-age on neonatal outcome among very-low-birth-weight infants. *Pediatr Neonatol* 2015;**56**:101-107.
189. Turunen R, Andersson S, Laivuori H, et al. Increased postnatal inflammation in mechanically ventilated preterm infants born to mothers with early-onset preeclampsia. *Neonatology* 2011;**100**:241-247.
190. Uberos J, Jimenez-Montilla S, Molina-Oya M, Garcia-Serrano JL. Early energy restriction in premature infants and bronchopulmonary dysplasia: A cohort study. *Br J Nutr* 2020;**123**:1024-1031.
191. van Mastrigt E, Zweekhorst S, Bol B, et al. Ceramides in tracheal aspirates of preterm infants: Marker for bronchopulmonary dysplasia. *PLoS one* 2018;**13**:e0185969.
192. Vayaltrikkovil S, Vorhies E, Stritzke A, et al. Prospective study of pulmonary hypertension in preterm infants with bronchopulmonary dysplasia. *Pediatr Pulmonol* 2019;**54**:171-178.
193. Viscardi RM, Muhumuza CK, Rodriguez A, et al. Inflammatory markers in intrauterine and fetal blood and cerebrospinal fluid compartments are associated with adverse pulmonary and neurologic outcomes in preterm infants. *Pediatr Res* 2004;**55**:1009-1017.
194. Vrlench LA, Bozynski ME, Shyr Y, Schork MA, Roloff DW, McCormick MC. The effect of bronchopulmonary dysplasia on growth at school age. *Pediatrics* 1995;**95**:855-859.
195. Wadhawan R, Oh W, Perritt R, et al. Association between early postnatal weight loss and death or BPD in small and appropriate for gestational age extremely low-birth-weight infants. *J Perinatol* 2007;**27**:359-364.
196. Wang K, Huang X, Lu H, Zhang Z. A comparison of KL-6 and Clara cell protein as markers for predicting bronchopulmonary dysplasia in preterm infants. *Dis Markers*. 2014;**2014**:736536.
197. Wang C-H, Shi L-P, Ma X-L, DU L. Clinical features and prognosis of bronchopulmonary dysplasia complicated by pulmonary hypertension in preterm infants. *Chin J Contemp Pediatr* 2018;**20**:893-896.
198. Wang H, Julien KRS, Stevenson DK, et al. A genome-wide association study (GWAS) for bronchopulmonary dysplasia. *Pediatrics* 2013;**132**:290-297.
199. Wang LY, Luo HJ, Hsieh WS, et al. Severity of bronchopulmonary dysplasia and increased risk of feeding desaturation and growth delay in very low birth weight preterm infants. *Pediatr Pulmonol* 2010;**45**:165-173.
200. Weismann C, Asnes J, Bazy-Asaad A, Tolomeo C, Ehrenkranz R, Bizzarro M. Pulmonary hypertension in preterm infants: results of a prospective screening program. *J Perinatol* 2017;**37**:572-577.
201. Wemhöner A, Ortner D, Tschirch E, Strasak A, Rüdiger M. Nutrition of preterm infants in relation to bronchopulmonary dysplasia. *BMC Pulm Med* 2011;**11**:1-6.
202. Westby-Wold S, Sommerfelt K, Reigstad H, et al. Neonatal mortality and morbidity in extremely preterm small for gestational age infants: a population based study. *Arch Dis Child Fetal Neonatal Ed* 2009;**94**:F363-F367.
203. Wilmsink FA, Reijnierse J, Reiss IK, Steegers EA, de Jonge RC. Preeclampsia and risk of developing bronchopulmonary dysplasia in very preterm neonates. *Pregnancy Hypertens* 2019;**15**:57-63.
204. Wirbelauer J, Thomas W, Rieger L, Speer CP. Intrauterine growth retardation in preterm infants  $\leq$  32 weeks of gestation is associated with low white blood cell counts. *Am J Perinatol* 2010;**27**:819-824.
205. Withagen ML, Visser W, Wallenburg HC. Neonatal outcome of temporizing treatment in early-onset preeclampsia. *Eur J Obstet Gynecol Reprod Biol* 2001;**94**:211-215.
206. Wocadlo C, Rieger I. Developmental outcome at 12 months corrected age for infants born less than 30 weeks gestation: influence of reduced intrauterine and postnatal growth. *Early Hum Dev* 1994;**39**:127-137.
207. Won Choi C, Il Kim B, Kim HS, Dong Park J, Choi JH, Woo Son D. Increase of interleukin-6 in tracheal aspirate at birth: A predictor of subsequent bronchopulmonary dysplasia in preterm infants. *Acta Paediatr*. 2006;**95**:38-43.
208. Xu Y-P. Bronchopulmonary dysplasia in preterm infants born at less than 32 weeks gestation. *Global Pediatric Health* 2016;**3**:2333794X16668773.
209. Xydis V, Drougia A, Giapros V, Argyropoulou M, Andronikou S. Brain growth in preterm infants is affected by the degree of growth restriction at birth. *J Matern Fetal Neonatal Med* 2013;**26**:673-679.
210. Yallapragada SG, Mestan KK, Palac H, et al. Placental villous vascularity is decreased in premature infants with bronchopulmonary dysplasia-associated pulmonary hypertension. *Pediatr Dev Pathol* 2016;**19**:101-107.
211. Yen TA, Yang HI, Hsieh WS, et al. Preeclampsia and the risk of bronchopulmonary dysplasia in VLBW infants: a population based study. *PLoS one* 2013;**8**:e75168.
212. Yılmaz C, Köksal N, Özkan H, Dorum BA, Bağcı O. Low serum IGF-1 and increased cytokine levels in tracheal aspirate samples are associated with bronchopulmonary dysplasia. *Turk J Pediatr* 2017;**59**:122-129.
213. Yoon BH, Romero R, Kim KS, et al. A systemic fetal inflammatory response and the development of bronchopulmonary dysplasia-An elevated. *Am J Obstet Gynecol* 1999;**181**:773-779.
214. Yu HJ, Kim ES, Kim JK, et al. Outcomes of small for gestational age micropremies depending on how young or how small they are. *Korean J. Pediatr* 2011;**54**:246.
215. Zanardo V, Savio V, Giacomini C, Rinaldi A, Marzari F, Chiarelli S. Relationship between neonatal leukemoid reaction and bronchopulmonary dysplasia in low-birth-weight infants: a cross-sectional study. *Am J Perinatol* 2002;**19**:379-386.
216. Zhang H, Fang J, Su H, Chen M. Risk factors for bronchopulmonary dysplasia in neonates born at  $\leq$  1500 g (1999–2009). *Pediatr Int* 2011;**53**:915-920.
